# Supplementary material
Source: ML conference proceedings conference paper supplement (https://openreview.net/forum?id=gd20oaZqqF)
Supplement: supplementary_material [file attachment]

---

# Towards Optimal Caching and Model Selection for Large Model Inference

---

Anonymous Author(s)

Affiliation

Address

email

## Abstract

Large Language Models (LLMs) and other large foundation models have achieved impressive results, but their size exacerbates existing resource consumption and latency challenges. In particular, the large-scale deployment of these models is hindered by the significant resource requirements during inference. In this paper, we study two approaches for mitigating these challenges: employing a cache to store previous queries and learning a model selector to choose from an ensemble of models for query processing.

Theoretically, we provide an optimal algorithm for jointly optimizing both approaches to reduce the inference cost in both offline and online tabular settings. By combining a caching algorithm, namely Greedy Dual Size with Frequency (GDSF) or Least Expected Cost (LEC), with a model selector, we achieve optimal rates in both offline and online settings. Empirically, simulations show that our caching and model selection algorithm greatly improves over the baselines, with up to  $50\times$  improvement over the baseline when the ratio between the maximum cost and minimum cost is 100. Experiments on real datasets show a  $4.3\times$  improvement in FLOPs over the baseline when the ratio for FLOPs is 10, and a  $1.8\times$  improvement in latency when the ratio for average latency is 1.85.

## 1 Introduction

The recent emergence of Large Language Models (LLMs) and foundation models has significantly increased the capabilities of AI systems (Bubeck et al., 2023; Nori et al., 2023; Ziegler et al., 2019; Ouyang et al., 2022; OpenAI, 2023; Beeching et al., 2023; Chowdhery et al., 2022; Wei et al., 2022a; Google, 2023). However, this progress comes at the cost of increased resource consumption and latency during both training and inference, presenting challenges not only in real-world deployment but also in terms of environmental impact and energy usage (Sharir et al., 2020; Patterson et al., 2021; Bommasani et al., 2022). For instance, LLM-based chatbots typically consist of large transformer-based networks with parameter counts ranging from one to several hundred billion (Zhou et al., 2023). Moreover, the auto-regressive nature of LLMs exacerbates the issue of latency and resource consumption because the model can only generate one token at a time. Thus, compared to traditional AI-powered services, language model inference costs are much higher and the latency is significantly longer, making it nearly impossible to process each query using LLMs in high-throughput query systems like search engines.

In this paper, we explore two simple yet effective strategies: employing a caching system to store previous queries and developing a model selector to choose the most appropriate model from a set of models for processing the queries. The general workflow of our proposed LLM-based inference system is shown in Figure 1: upon receiving a query or prompt, we initially check if it can be retrieved

from the cache. If the query is not found in the cache, we employ the model selector to determine which model should be used for processing it first, based on the estimated cost for both models.

The choice of cost function and models can vary based on the goal. One measure of cost, for example, could be floating point operations (FLOPs). Other alternatives could include the number of API calls as a measure of resource consumption, latency as a measure of time consumption, or a score provided by a user as a measure of user satisfaction. The cost could also be a weighted sum of multiple factors. For the models, a natural choice would be to have a small and a large model, where the small model costs less and is also less accurate, and the large model has a higher cost and also provides higher accuracy. Another alternative would be to have models with expertise in different areas, i.e., each model has high accuracy in its own area of expertise. We provide more discussion in Appendix A.

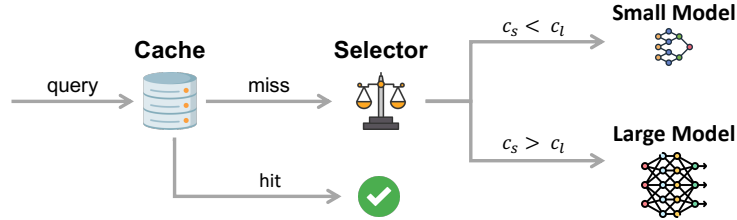

Figure 1: A workflow for LLM-based inference with caching and model selection.

There is a long history of existing literature on caching algorithms, with prominent applications including computer architecture and web retrieval (Smith, 1982; Wang, 1999; Kumar and Singh, 2016). Existing caching algorithms deal with queries with different frequencies and cost, and must also provide guidelines for choosing the cache size. In addition to these well-known difficulties, using caching for LLMs raises new challenges, including:

- **The need for fuzzy search.** Since the prompt lies in a discrete space that is exponentially large with respect to the token size, it is impossible to match and save all distinct queries. Thus, to be at all useful, approximate matching and grouping is required when retrieving queries saved in the cache.
- **The randomness of the cost.** The cost for processing each query is a random variable that depends on the query and has a large variance due to the auto-regressive generation procedure and the difference in the length and quality of generated responses. When combined with the long-tailed distribution of the query frequency, the estimation of the cost requires a non-trivial algorithm design.
- **The effect of model selection.** When the cache system is combined with the model selector, the estimation of cost must change accordingly to take into consideration the different costs induced by various models.

For the fuzzy search problem, semantic search or vector-embedding-based ideas provide a systematic solution that includes embedding extraction and matching algorithms (Bast et al., 2016; Chang et al., 2020; Kamalloo et al., 2023). To simplify the problem, we assume that there exists some semantic search oracle that can group the prompts with the same semantic meaning and that the total cache size is limited by the number of queries, ignoring the difference in cache size between each individual query and response.

The remainder of this paper is organized as follows. In Section 2, we formally define the pipeline of caching and model selection. In Section 3, we study the optimality of the Least Expected Cost (LEC) caching strategy, which estimates the frequency and cost of processing each query, and evicts the one with the least estimated expected cost when there is only one model to call. In section 4, we consider the case when we have access to two models, and jointly design optimal caching and model selector. In both sections, we start by assuming there are infinite samples and then analyze the offline and online learning cases where the cost and frequency need to be learned from data. The experimental results are presented in Section 5. We discuss the potential choices of cost, model, and output in the real world in Appendix A. We provide a brief discussion of the generalization to variable cache sizes in Appendix B and of the generalization to multi-model selection in Appendix C.

## 1.1 Related Work

**Cache Replacement Algorithms** Traditional cache replacement algorithms investigate optimal ways to cache queries with different frequencies, costs, and cache sizes. To address varying frequencies, a standard approach is to use a Least Frequently Used (LFU) or Least Recently Used (LRU) cache eviction strategy (Lee et al., 2001). These have been proven to be optimal for both adversarial and stochastic queries (Stallings and Paul, 2012; Bura et al., 2021). Caching has also been combined with machine learning advice and online learning analysis in the literature Chang et al. (2018); Shuja et al. (2021); Jiang et al. (2019); He et al. (2017); Mukhopadhyay and Sinha (2021); Faizal et al. (2023). When varying costs and varying frequencies exist simultaneously, Jin and Bestavros (2000); Arlitt et al. (2000) propose and study the Greedy Dual-Size with Frequency (GDSF) replacement algorithm, which takes both frequency and cost into consideration. Bahn (2005) proposes the Least Expected Cost (LEC) algorithm, which is similar to GDSF, except that it estimates frequency from data. Our work extends this idea by attempting to learn a model for both frequency and cost from data. And we explore the statistical optimality of these algorithms in both offline and online settings. We also investigate combining caching algorithms with model selection in order to boost performance.

**Acceleration of LLM Inference** Much effort has been devoted to reducing the cost and latency of LLMs during inference. For example, post-training quantization-based approaches aim to compress the model size by using lower-precision arithmetic without losing too much accuracy (Gholami et al., 2021; Frantar et al., 2023). Early-exit frameworks aim to utilize the output in the middle decoder blocks so that only a small fraction of decoder blocks are called when processing a query (Bakhtiarnia et al., 2022; Schuster et al., 2022). The Mixture of Experts approach designs a gating function that only assigns a small fraction of the network for each query (Fedus et al., 2022). Embedding recycling caches activations from an intermediate layer of a pre-trained model to accelerate the training and inference procedure (Du et al., 2020; Wei et al., 2022b; Saad-Falcon et al., 2023). LLM cascade starts with the smallest model and continues to call larger models if the output is not acceptable (Chen et al., 2023b). The big little transformer decoder framework uses a smaller model to generate a draft response and calls the large model to identify the unreliable tokens and do correction (Kim et al., 2023). Similar ideas have been combined with speculative sampling to guarantee that the output remains the same in distribution as that of the large models (Chen et al., 2023a; Leviathan et al., 2022).

## 2 Formulation

We formalize the workflow in Figure 1. Consider the set of (finite) prompts / queries  $\mathcal{Q} \subset \mathbb{R}^d$ . In the  $t$ -th round, a query  $q_t \in \mathcal{Q}$  is sampled from a fixed population distribution  $P \in \Delta(\mathcal{Q})$ . We maintain a small set of cache  $\mathcal{L}_t \subset \mathcal{Q}$  with  $|\mathcal{L}_t| \leq L$ . We say the query hits the cache if the query satisfies  $q_t \in \mathcal{L}_t$ . When the query hits the cache, the incurred cost is 0. When the query does not hit the cache, we choose among the existing models to process the query.

In the processing stage, we first describe the setting of caching without model selection, and extend it to the case of caching with model selection.

### 2.1 Caching without Model Selection

In the case when we only have one model, let  $C_l(q)$  denote the random variable of the cost when processing the query with the model. Assume that  $C_l(q)$  is supported on  $[B_1, B_2]$  with  $B_2 > B_1 > 0$  being the upper and lower bounds for the cost. Let  $c_l^*(q) = \mathbb{E}[C_l(q)]$  be the expected true cost of processing the query  $q$ . The cost for a given query  $q$  and cache  $\mathcal{L}$  can be written as:

$$\text{cost}(q, \mathcal{L}) = \mathbb{1}(q \notin \mathcal{L})\mathbb{E}[C_l(q)] = \mathbb{1}(q \notin \mathcal{L})c_l^*(q).$$

By taking the expectation over the distribution  $q$ , we have the expected cost as

$$\text{cost}(\mathcal{L}) = \sum_q P(q) \mathbb{1}(q \notin \mathcal{L}) c_l^*(q).$$

In the offline learning setting, we collect an offline dataset and hope to learn a caching policy  $\hat{\mathcal{L}}$  such that  $\text{cost}(\hat{\mathcal{L}})$  is minimized.

126 In the online setting, the query comes in a streaming fashion. At the beginning of each round, we  
 127 receive a query  $q_t$ . If the query misses the current cache  $\mathcal{L}_t$ , we let the model to process the query  
 128 and receive a cost  $c_t \sim \mathbb{P}_{C_l}$ . Then we can choose to update the cache  $\mathcal{L}_t$  by adding the current query  
 129 and response to the cache, and replacing one of the existing cached items if the cache  $\mathcal{L}_t$  is full. If the  
 130 query hits the cache  $q_t \in \mathcal{L}_t$ , then the cost for this round is set to 0 with no more observations. In this  
 131 case, we are interested in characterizing the average difference in the cost throughout the execution  
 132 of the online learning process. This can be characterized by the regret:

$$\text{Regret}_{\text{cache}}(T) = \sum_{t=1}^T \mathbb{E}[\text{cost}(q_t, \mathcal{L}_t) - \text{cost}(q_t, \mathcal{L}^*)].$$

## 133 2.2 Caching with Model Selection

134 For the simplicity of the notation, we focus on the case of selecting from a small model and a large  
 135 model<sup>1</sup>, and discuss how it can be generalized to the case of selecting from multiple models in  
 136 Appendix C. Let  $C_s(q)$  denote the random variable of the cost when processing the query with the  
 137 small model, and  $C_l(q)$  denote the random variable of the cost when processing the query with the  
 138 large model. We assume that both random variables are supported on  $[B_1, B_2]$ . We observe *i.i.d.*  
 139 samples from random variables  $C_s(q)$  when executing the small model, and  $C_l(q)$  when executing  
 140 the large model. Denote the expected cost as  $c_s^*(q) = \mathbb{E}[C_s(q)]$  and  $c_l^*(q) = \mathbb{E}[C_l(q)]$ .

141 Let  $\pi : \mathcal{Q} \mapsto [0, 1]$  be the (possibly random) model selection policy that maps the query  $q$  to values  
 142 in  $[0, 1]$ , where  $\pi(q) = 1$  represents that the query is always sent to the small model, and  $\pi(q) = 0$   
 143 represents the query is always sent to the large model. The randomness in the policy  $\pi$  is independent  
 144 of the cost  $C_s(q), C_l(q)$ . The total cost can be written as the following function of the query  $q$ , cache  
 145  $\mathcal{L}$  and policy  $\pi$ :

$$\begin{aligned} \text{cost}(q, \mathcal{L}, \pi) &= \mathbb{1}(q \notin \mathcal{L}) \mathbb{E}[C_s(q)\pi(q) + C_l(q)(1 - \pi(q))] \\ &= \mathbb{1}(q \notin \mathcal{L}) (c_s^*(q)\pi(q) + c_l^*(q)(1 - \pi(q))). \end{aligned}$$

146 By taking the expectation over  $q$ , we have the expected cost as

$$\text{cost}(\mathcal{L}, \pi) = \sum_q P(q) \mathbb{1}(q \notin \mathcal{L}) (c_s^*(q)\pi(q) + c_l^*(q)(1 - \pi(q))).$$

147 In the offline learning setting, we collect an offline dataset and hope to learn a caching policy  $\hat{\mathcal{L}}$  and a  
 148 selector  $\hat{\pi}$  such that  $\text{cost}(\hat{\mathcal{L}}, \hat{\pi})$  is minimized. In the online setting, we get to update the cache in each  
 149 round by adding the current query into the cache and evicting the ones in the cache if full. When  
 150 the query  $q_t$  misses the cache in round  $t$ , we will observe a sample from  $C_s(q_t)$  if it is processed  
 151 by the small model, or a sample from  $C_l(q_t)$  if it is processed by the large model. There will be no  
 152 observations of cost if  $q_t$  hits the cache. We aim at minimizing the regret:

$$\text{Regret}_{\text{sel}}(T) = \sum_{t=1}^T \mathbb{E}[\text{cost}(q_t, \mathcal{L}_t, \pi_t) - \text{cost}(q_t, \mathcal{L}^*, \pi^*)].$$

## 153 3 Optimal Caching without Model Selection

### 154 3.1 Population Setting

155 We start with the population setting where the probability distribution  $P$  and the cost  $c_l^*$  are both  
 156 known. In the case with only one model, the optimal caching strategy is the Least Expected Cost  
 157 (LEC) or Greedy Dual Size with Frequency (GDSF) algorithm:

$$\mathcal{L}^* = \mathcal{L}_{\text{LEC}} = \arg \min_{\mathcal{L}: |\mathcal{L}| \leq L} \text{cost}(\mathcal{L}) = \arg \min_{\mathcal{L}: |\mathcal{L}| \leq L} \sum_{q \in \mathcal{Q}} P(q) \mathbb{1}(q \notin \mathcal{L}) c_l^*(q).$$

<sup>1</sup>Note that although we name the models as small and large models, we do not impose any assumption on the relationship between their costs. And the model size and cost function can be arbitrary for both models.

158 The traditional frequency-based caching strategy, including Least Recent Used (LRU) and Least  
 159 Frequently Used (LFU), aims at caching the most frequent queries:

$$\mathcal{L}_{\text{LFU}} = \arg \min_{\mathcal{L}: |\mathcal{L}| \leq L} \sum_{q \in \mathcal{Q}} P(q) \mathbb{1}(q \notin \mathcal{L}).$$

160 We show in Appendix D that the ratio between the cost of LFU and LEC can be as high as  $\frac{\max_{q \in \mathcal{Q}} c_l^*(q)}{\min_{q \in \mathcal{Q}} c_l^*(q)}$   
 161 in the worst case, which shows that LFU can be highly-suboptimal when the cost varies largely.

### 162 3.2 Finite Sample Setting: Offline Learning

163 From the previous section, we see the characterization of the optimal caching strategy in the population  
 164 setting. Consider the finite-sample offline learning setting, where we hope to produce one cache  $\mathcal{L}$   
 165 based on prior data such that the introduced cost is minimized. Let  $\mathcal{D}_N = \{(q_1, c_1), \dots, (q_N, c_N)\}$ ,  
 166 where  $q_i$  is sampled from the distribution  $P(\cdot)$ , and  $c_i$  is a sample from random variable  $C_l(q_i)$ .  
 167 We consider estimating  $P, c_l^*$  with some oracles  $\hat{P} = \text{DenEstOracle}(q_1, \dots, q_N)$ ,  $\hat{c}_l(q) =$   
 168  $\text{RegressionOracle}(\mathcal{D}_N)$ . In practice, one may remove the last year of the pre-trained language  
 169 model and concatenate it with a linear head and fine-tune the model as the estimators. For theoretical  
 170 analysis, we focus on the tabular case, where we set both  $\hat{P}$  and  $\hat{c}_l(q)$  to be the plug-in estimator:

$$\hat{P}(q) = \frac{\sum_{i=1}^N \mathbb{1}(q_i = q)}{N}, \quad (1)$$

$$\hat{c}_l(q) = \begin{cases} \frac{\sum_{i=1}^N \mathbb{1}(q_i = q) c_i}{\sum_{i=1}^N \mathbb{1}(q_i = q)}, & \text{if } \sum_{i=1}^N \mathbb{1}(q_i = q) > 0 \\ B_1, & \text{if } \sum_{i=1}^N \mathbb{1}(q_i = q) = 0 \end{cases}. \quad (2)$$

171 In practice, the distribution of  $q$  may have a long tail. Although the estimation of  $P(q)$  is uniformly  
 172 good for all  $q$ , the estimation of  $c^*(q)$  can be bad for the queries that are visited less. To select  
 173 the maximum  $L$  elements from the imbalanced samples, we compensate the plug-in estimator by  
 174 introducing pessimism (Rashidinejad et al., 2021; Jin et al., 2021)<sup>2</sup>. As we show in Lemma 1, the true  
 175 frequency for any query  $q \in \mathcal{L}^*$  is lower bounded by some constant that depends on  $B_1, B_2, |\mathcal{Q}|$ . Thus  
 176 the pessimism helps eliminate those less visited queries in the long tail distribution and encourages  
 177 caching the queries in  $\mathcal{L}^*$ . The lower-confidence-bound based estimator is:

$$\hat{\mathcal{L}} = \arg \min_{\mathcal{L}: |\mathcal{L}| \leq L} \sum_{q \in \mathcal{Q}} \mathbb{1}(q \notin \mathcal{L}) \hat{P}(q) \cdot \max \left( B_1, \left( \hat{c}_l(q) - (B_2 - B_1) \sqrt{\frac{\log(6N|\mathcal{Q}|/\delta)}{2 \sum_{n=1}^N \mathbb{1}(q_n = q)}} \right) \right).$$

178 We show how the cost for the caching from the empirical estimate differs from the optimal cost.

179 **Theorem 1.** Assume that  $N \geq \frac{8B_2|\mathcal{Q}| \log(3L/\delta)}{B_1}$  and taking  $\delta = 1/N$ . We have

$$\mathbb{E}[\text{cost}(\hat{\mathcal{L}}) - \text{cost}(\mathcal{L}^*)] \leq C(B_2 - B_1)L \cdot \sqrt{\frac{B_2|\mathcal{Q}| \log(N|\mathcal{Q}|)}{NB_1}}.$$

180 The proof is deferred to Appendix E, where we prove a stronger high probability bound rather than a  
 181 bound in expectation. From the theorem, we know that the cost of the finite-sample caching policy  
 182 converges to the cost of the optimal policy at a rate of  $1/\sqrt{N}$ , which achieves the optimal dependence  
 183 on  $N$ . The insights from the tabular case also indicate that the cost needs to be estimated in a  
 184 conservative fashion when considered for the cache replacement algorithm.

### 185 3.3 Finite Sample Setting: Online Learning

186 We summarize the caching algorithm pipeline in 1, which relies on the two estimation oracles  
 187 DenEstOracle and RegressionOracle, which estimate both the frequency and cost of models from  
 188 data.

<sup>2</sup>If we impose a uniform lower bound on the probability  $P(q)$ , then the pessimism can be replaced with the plug-in estimator. However, it is usually not the case in practice since  $P(q)$  usually comes with a long tail.

---

**Algorithm 1** Caching in Online Learning
 

---

```

1: Initialize the set of cache  $\mathcal{L}_1 = \{\}$ , past observations  $\mathcal{H}_1 = \{\}$ ,  $\hat{c}_{l,0}(q) = B_1, \forall q \in \mathcal{Q}$ .
2: For iteration  $t = 1, 2, \dots, T$ 
3:   Receive query  $q_t$ .
4:   Update the density estimation  $\hat{P}_t = \text{DenEstOracle}(q_1, \dots, q_t)$ .
5:   If  $q_t \in \mathcal{L}_t$ :
6:     Output the cached result, set  $\hat{c}_{l,t} = \hat{c}_{l,t-1}$ , update the past observation  $\mathcal{H}_t = \mathcal{H}_{t-1} \cup (q_t, \times)$ ,
       and continue.
7:   Use the large model to process the query, and observe a cost  $c_t \sim \mathbb{P}_{C_l(q)}$ .
8:   Update the past observation  $\mathcal{H}_t = \mathcal{H}_{t-1} \cup (q_t, c_t)$ .
9:   Update  $\hat{c}_{l,t} = \text{RegressionOracle}(\mathcal{H}_t)$ .
10:  If  $|\mathcal{L}_t| < L$ :
11:    Let  $\mathcal{L}_{t+1}$  be the union of  $\mathcal{L}_t$  and  $q_t$ .
12:  Else if  $\hat{P}_t(q_t) \cdot \hat{c}_{l,t}(q_t) > \min_{q \in \mathcal{L}_t} \hat{P}_t(q) \cdot \hat{c}_{l,t}(q)$ :
13:    Replace the minimizer element of  $\hat{P}_t(q) \cdot \hat{c}_{l,t}(q)$  in the cache  $\mathcal{L}_t$  with  $q_t$  to get  $\mathcal{L}_{t+1}$ .

```

---

189 For theoretical analysis, we focus on the tabular case and take the oracles as follows

$$\hat{P}_t(q) = \frac{\sum_{i=1}^t \mathbb{1}(q_i = q)}{t}, \quad (3)$$

$$\hat{c}_{l,t}(q) = \begin{cases} B_1, & \text{if } \sum_{i=1}^t \mathbb{1}(c_i \neq \times, q_i = q) = 0, \\ \max \left( B_1, \frac{\sum_{i=1}^t \mathbb{1}(c_i \neq \times, q_i = q) c_i}{\sum_{i=1}^t \mathbb{1}(c_i \neq \times, q_i = q)} - (B_2 - B_1) \sqrt{\frac{\log(6T|\mathcal{Q}|/\delta)}{2 \sum_{i=1}^t \mathbb{1}(c_i \neq \times, q_i = q)}} \right), & \text{otherwise} \end{cases} \quad (4)$$

190 For the estimation of density, we use plug-in estimator since there is no imbalance in the sampling  
 191 process. For the estimation of the cost, we subtract the confidence bound to include pessimism. We  
 192 have the following regret guarantee.

193 **Theorem 2.** When substituting the DenEstOracle and RegressionOracle with Equation (3) and (4)  
 194 and set  $\delta = 1/T$ , we have for some universal constant  $C$ :

$$\text{Regret}_{\text{cache}}(T) \leq \frac{CL(B_2 - B_1)B_2|\mathcal{Q}|L \log^2(T|\mathcal{Q}|)}{B_1} \cdot \sqrt{T}.$$

195 On the other hand, for any caching policy  $\{\mathcal{L}_t\}_{t=1}^T$ , there exist some cases of  $P(q), c_l^*(q)$  such that  
 196 for some universal constant  $C'$ ,

$$\text{Regret}_{\text{cache}}(T) \geq C' \sqrt{T}.$$

197 The proof is deferred to Appendix F. Different from the offline case, one interesting feature of the  
 198 online case is the *partial observation phenomenon*: when the query hits the cache, it will not be  
 199 processed by the model, and thus we cannot observe the sample from  $C_l(q)$  in this round. This is  
 200 different from the traditional bandit literature where the selected arm is always observed in each  
 201 round. And the partial observation thus requires new upper and lower bound analysis.

## 202 4 Optimal Caching and Model Selection

### 203 4.1 Population Setting

204 In the case when we have access to two models, we need to design a good caching and model  
 205 selection strategy jointly. We can compute the optimal caching and model selection policy as  
 206  $\mathcal{L}^*, \pi^* = \arg \min_{\mathcal{L}, \pi} \text{cost}(\mathcal{L}, \pi)$ , which gives the following solution:

$$\begin{aligned} \pi^*(q) &= \mathbb{1}(c_s^*(q) \leq c_l^*(q)), \\ \mathcal{L}^* &= \arg \min_{\mathcal{L}: |\mathcal{L}| \leq L} \sum_{q \in \mathcal{Q}} P(q) \mathbb{1}(q \notin \mathcal{L}) \min(c_s^*(q), c_l^*(q)). \end{aligned}$$

Such optimal strategies are straightforward:  $\pi^*$  always assigns the query to the model with a smaller cost, and  $\mathcal{L}^*$  saves the  $L$  queries with the largest  $P(q) \cdot \min(c_s^*(q), c_l^*(q))$ .

For the model selection algorithm, we consider two baselines: (a) one always uses large model  $\pi_l(q) \equiv 0$ ; (b) one always uses the small model  $\pi_s(q) \equiv 0$ . This is related to the LLM cascade idea in the concurrent work (Chen et al., 2023b). We provide more discussions in Appendix A, and the comparisons between baselines and  $\pi^*$  in Appendix D.

## 4.2 Finite Sample Setting: Offline Learning

Consider the finite sample case. Let  $\mathcal{D}_N = \{(q_1, c_{s,1}, c_{l,1}), \dots, (q_N, c_{s,N}, c_{l,N})\}$ , where  $c_{s,n}$  is a sample from random variable  $C_s(q_n)$ , the observed cost for processing query  $q_n$  with small model in round  $n$ . And  $c_{l,n}$  is a sample from random variable  $C_l(q_n)$ , the observed cost for processing query  $q_n$  with the large model in round  $n$ . We consider estimating  $P, c_s^*, c_l^*$  with some oracles  $\hat{P} = \text{DenEstOracle}(q_1, \dots, q_N)$ ,  $\hat{c}_s(q) = \text{RegressionOracle}(\mathcal{D}_N)$ . We focus on the tabular case for theoretical analysis, where we set  $\hat{P}, \hat{c}_s(q)$  and  $\hat{c}_l(q)$  to be the plug-in estimator:

$$\hat{P}(q) = \frac{\sum_{i=1}^N \mathbb{1}(q_i = q)}{N}, \hat{c}_l(q) = \begin{cases} \frac{\sum_{i=1}^N \mathbb{1}(q_i = q) c_{l,i}}{\sum_{i=1}^N \mathbb{1}(q_i = q)}, & \text{if } \sum_{i=1}^N \mathbb{1}(q_i = q) > 0 \\ B_1, & \text{if } \sum_{i=1}^N \mathbb{1}(q_i = q) = 0 \end{cases},$$

$$\hat{c}_s(q) = \begin{cases} \frac{\sum_{i=1}^N \mathbb{1}(q_i = q) c_{s,i}}{\sum_{i=1}^N \mathbb{1}(q_i = q)}, & \text{if } \sum_{i=1}^N \mathbb{1}(q_i = q) > 0 \\ B_1, & \text{if } \sum_{i=1}^N \mathbb{1}(q_i = q) = 0 \end{cases}.$$

Similar to the case of caching without model selection, for long-tailed distribution  $P(q)$ , the estimation of  $c_s^*(q), c_l^*(q)$  can be bad for the queries that are visited less. To select the maximum  $L$  elements from the plug-in estimator, we introduce pessimism to the estimate of  $\hat{c}_l$  and  $\hat{c}_s$ . This introduces the following design of caching and model selector  $\hat{\mathcal{L}}, \hat{\pi}$ :

$$\hat{\pi}(q) = \mathbb{1}(\hat{c}_s(q) \leq \hat{c}_l(q)),$$

$$\hat{\mathcal{L}} = \arg \min_{\mathcal{L}: |\mathcal{L}| \leq L} \sum_{q \in \mathcal{Q}} \mathbb{1}(q \notin \mathcal{L}) \hat{P}(q) \max \left( B_1, \min(\hat{c}_s(q), \hat{c}_l(q)) - (B_2 - B_1) \sqrt{\frac{\log(8|\mathcal{Q}|/\delta)}{2 \sum_{n=1}^N \mathbb{1}(q_n = q)}} \right).$$

We show the cost for the caching and model selector from the empirical estimate is close to the optimal cost. The proof is deferred to Appendix G.

**Theorem 3.** Assume that  $N \geq \frac{8B_2|\mathcal{Q}|\log(4L/\delta)}{B_1}$  and take  $\delta = 1/N$ . We have

$$\mathbb{E}[\text{cost}(\hat{\mathcal{L}}, \hat{\pi}) - \text{cost}(\mathcal{L}^*, \pi^*)] \leq CL(B_2 - B_1) \cdot \sqrt{\frac{B_2|\mathcal{Q}|\log(8|\mathcal{Q}|N)}{B_1N}}.$$

## 4.3 Finite Sample Setting: Online Learning

Now consider the online case. We first propose a meta-algorithm in Algorithm 2.

We provide a theoretical analysis of the above meta-algorithm for the tabular case, with DenEstOracle

$\hat{P}_t(q) = \frac{\sum_{i=1}^t \mathbb{1}(q_i = q)}{t}$ , and RegressionOracle :

$$\hat{c}_{l,t}(q) = \begin{cases} B_1, & \text{if } \sum_{i=1}^t \mathbb{1}(s_i = 0, q_i = q) = 0 \\ \max \left( B_1, \frac{\sum_{i=1}^t \mathbb{1}(s_i = 0, q_i = q) c_{l,i}}{\sum_{i=1}^t \mathbb{1}(s_i = 0, q_i = q)} - (B_2 - B_1) \sqrt{\frac{\log(8T|\mathcal{Q}|/\delta)}{2 \sum_{i=1}^t \mathbb{1}(s_i = 0, q_i = q)}} \right), & \text{otherwise,} \end{cases}$$

$$\hat{c}_{s,t}(q) = \begin{cases} B_1, & \text{if } \sum_{i=1}^t \mathbb{1}(s_i = 1, q_i = q) = 0 \\ \max \left( B_1, \frac{\sum_{i=1}^t \mathbb{1}(s_i = 1, q_i = q) c_{s,i}}{\sum_{i=1}^t \mathbb{1}(s_i = 1, q_i = q)} - (B_2 - B_1) \sqrt{\frac{\log(8T|\mathcal{Q}|/\delta)}{2 \sum_{i=1}^t \mathbb{1}(s_i = 1, q_i = q)}} \right), & \text{otherwise.} \end{cases}$$

We provide the following theorem on the regret of the proposed algorithm.

**Theorem 4.** Substituting the oracles in Algorithm 2 with the oracles above and  $\delta = 1/T$ , we have

$$\text{Regret}_{\text{sel}}(T) \leq \frac{CL(B_2 - B_1)B_2|\mathcal{Q}|L\log^2(T|\mathcal{Q}|)}{B_1} \cdot \sqrt{T}.$$

---

**Algorithm 2** Joint Design of Caching and Model Selection
 

---

- 1: Initialize the set of cache  $\mathcal{L}_1 = \{\}$ , past observations  $\mathcal{H}_1 = \{\}$ ,  $\hat{c}_{l,0}(q) = B_1$ ,  $\hat{c}_{s,0}(q) = B_1$ , model selection policy  $\pi_0(q) = 1, \forall q \in \mathcal{Q}$ .
  - 2: **For** iteration  $t = 1, 2 \dots, T$
  - 3:   Receive query  $q_t$ .
  - 4:   Update the density estimation  $\hat{P}_t = \text{DenEstOracle}(q_1, \dots, q_t)$ .
  - 5:   **If**  $q_t \in \mathcal{L}_t$ : output the cached result, set  $\hat{c}_{s,t} = \hat{c}_{s,t-1}$ ,  $\hat{c}_{l,t} = \hat{c}_{l,t-1}$ ,  $\pi_t = \pi_{t-1}$ , update the past observation  $\mathcal{H}_t = \mathcal{H}_{t-1} \cup (q_t, \times, \times)$ , and continue.
  - 6:   Select the models according to  $s_t = \pi_t(q_t)$ .
  - 7:   Update the past observation  $\mathcal{H}_t = \mathcal{H}_{t-1} \cup (q_t, s_t, c_t)$ .
  - 8:   Update  $\hat{c}_{l,t}$ ,  $\hat{c}_{s,t} = \text{RegressionOracle}(\mathcal{H}_t)$ . Set  $\pi_{t+1}(q) = \mathbb{1}(\hat{c}_{s,t}(q) < \hat{c}_{l,t}(q))$ .
  - 9:   **If**  $|\mathcal{L}_t| < L$ : let  $\mathcal{L}_{t+1}$  be the union of  $\mathcal{L}_t$  and  $q_t$ .
  - 10:   **Else if**  $\hat{P}_t(q_t) \cdot \min(\hat{c}_{s,t}(q_t), \hat{c}_{l,t}(q_t)) > \min_{q \in \mathcal{L}_t} \hat{P}_t(q) \cdot \min(\hat{c}_{s,t}(q), \hat{c}_{l,t}(q))$ :
  - 11:     replace the minimizer element in the cache  $\mathcal{L}_t$  on the RHS with  $q_t$  to get  $\mathcal{L}_{t+1}$ .
- 

233 The proof is deferred to Appendix H. Compared with the lower bound in Theorem 2, we know the  
 234 dependency on  $T$  is tight. The pessimism plays two different roles here: on one hand, it encourages  
 235 the exploration for model selection to choose the ones with more uncertainty in the cost; on the other  
 236 hand, it encourages the exploitation to be conservative about which query to save into the cache.

237 For the model selector to work well, one needs to have a small yet accurate model selector. In the  
 238 case when the model selector is not accurate, the small model always comes with a much smaller  
 239 cost, and we are allowed to re-generate the responses and make corrections for the output, one may  
 240 combine LEC with cascade Chen et al. (2023b) to achieve better performance.

## 241 5 Experiments

### 242 5.1 Simulations for Algorithm Analysis

243 We conduct synthetic online and offline experiments for joint optimization of caching and model  
 244 selection. In Figure 2, we plot the cumulative cost and regret in online learning for LFU and LEC  
 245 caching algorithms. For LFU, we consider model selectors which always select the small or large  
 246 models as the baselines. We set the frequency distribution as power distribution with  $\alpha = 0.9$ . The  
 247 ground truth cost for each query processed by both models is set as a sample from  $100X + 1$ , where  
 248  $X$  is a random variable generated from a Bernoulli distribution with the parameter 0.5. We repeat the  
 249 simulation 100 times and plot the mean and standard deviation in the figure. Our simulation suggests  
 250 that LEC with model selector greatly improves the two baselines by a factor of  $50\times$  when the cost  
 251 ratio is 100. We include additional results on the synthetic datasets for both online and offline settings  
 252 with different  $\alpha$  values, cost ratios, and selector accuracy in Appendix I.

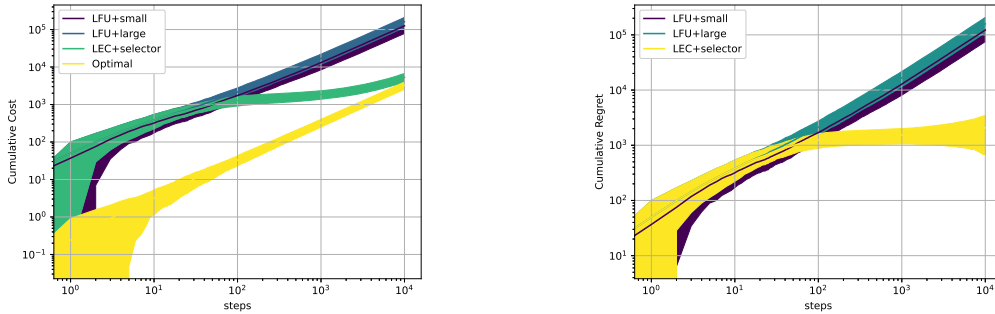

Figure 2: Comparisons between LFU with either small or large model selection and LEC with model selector. Both the  $x$ -axis and  $y$ -axis are logarithmic scales. The shaded regime represents the standard deviation calculated from the repeated experiments.



## 5.2 Experiments on Real Datasets

We evaluate our algorithms on two tasks: next-token prediction on the Lambada Paperno et al. (2016) dataset and chat assistant on the OpenAssistant Köpf et al. (2023) dataset.

For the next-token prediction task, we run the offline algorithm with two models: OPT-1.3B and OPT-13B Zhang et al. (2022) and use FLOPs as the cost. For a given query, an algorithm can choose to run the small model or the large model. If the small model is chosen but its result is wrong, the large model must be run and it will incur an additional penalty. We fine-tune a BERT-base model as the model selector by predicting whether the small model can give the correct result and achieve 80.2% accuracy. We compare our offline caching and selector algorithms against LFU, large-model-only, and cascade (which always calls the small model first). As shown in Table 1, LEC is better than LFU in all cases. Combining LEC and selector brings up to  $4.3\times$  cost reduction compared to the baseline “LFU + Large”. However, as the predictor accuracy is limited, the model selector may not be as good as the cascade algorithm in some cases. We leave the training of a better selector as future work.

On the chat assistant task, we run the online algorithm with two models: FastChat-T5-3B and Vicuna-13B Chiang et al. (2023), and use the inference latency as the cost. The rules to call these two models are similar to the previous task: if the response from the small model is not good enough, the large model will be called. The ratio between the average latency of the large model and the small model is 1.85. After a sufficient number of online learning steps, the selector learns the accurate costs of two models on this finite prompts set, so “LEC + selector” outperforms other algorithms in all cases on Table 2 with up to  $1.8\times$  latency reduction compared to “LFU + large” baseline.

| $\alpha$ | selector accuracy | LFU+ large | LFU+ cascade | LFU+ selector | LEC+ large | LEC+ cascade | LEC+ selector |
|----------|-------------------|------------|--------------|---------------|------------|--------------|---------------|
| 0.2      | 80%               | 3.46       | 3.95         | 2.66          | 3.42       | <b>1.51</b>  | 2.05          |
| 0.8      | 80%               | 10.77      | 12.11        | 8.18          | 10.33      | <b>4.09</b>  | 4.76          |
| 0.2      | 100%              | 3.46       | 3.95         | 1.97          | 3.42       | 1.51         | <b>1.01</b>   |
| 0.8      | 100%              | 10.77      | 12.11        | 6.04          | 10.33      | 4.09         | <b>2.50</b>   |

Table 1: Evaluation of offline algorithms on the Lambada dataset with OPT-1.3B and OPT-13B.  $\alpha$  is the parameter of the power distribution of the prompts. The table lists cumulative costs ( $10^3$ ) for different algorithms.

| $\alpha$ | LFU+ large | LFU+ cascade | LFU+ selector | LEC+ large | LEC+ cascade | LEC+ selector |
|----------|------------|--------------|---------------|------------|--------------|---------------|
| 0.2      | 9.21       | 13.93        | 7.26          | 8.70       | 8.78         | <b>6.01</b>   |
| 0.5      | 19.93      | 30.40        | 15.25         | 18.55      | 16.99        | <b>11.93</b>  |
| 0.8      | 28.05      | 42.31        | 21.24         | 25.94      | 20.24        | <b>15.50</b>  |

Table 2: Evaluation of online algorithms on the OpenAssistant dataset with FastChat-T5-3B and Vicuna-13B.  $\alpha$  is the parameter of the power distribution of the prompts. The table lists cumulative costs ( $10^3$ ) for different algorithms.

## 6 Conclusion and Future Work

In this paper, we study the joint optimization of caching and model selection and propose the optimal algorithm for the tabular case. There can be more problems along the line of caching and model selection for large models, including:

- Designing the optimal caching and model selection algorithm when there is a query queue, where the query arrives at a random interval rather than a fixed interval. A more complicated serving pattern also needs to take batching strategies into consideration.
- Understanding the scaling law of the predictors. We hope to use a small yet accurate model for prediction to reduce overhead introduced by the predictor. It is important to understand the trade-off between prediction accuracy, model size, and training data size.
- Designing optimal caching algorithm when the responses generated in each round have diverse qualities.

## References

- M. Arlitt, L. Cherkasova, J. Dilley, R. Friedrich, and T. Jin. Evaluating content management techniques for web proxy caches. *ACM SIGMETRICS Performance Evaluation Review*, 27(4): 3–11, 2000.
- H. Bahn. Web cache management based on the expected cost of web objects. *Information and Software Technology*, 47(9):609–621, 2005.
- A. Bakhtiarnia, Q. Zhang, and A. Iosifidis. Single-layer vision transformers for more accurate early exits with less overhead, 2022.
- H. Bast, B. Buchhold, E. Haussmann, et al. Semantic search on text and knowledge bases. *Foundations and Trends® in Information Retrieval*, 10(2-3):119–271, 2016.
- E. Beeching, Y. Belkada, K. Rasul, L. Tunstall, L. von Werra, N. Rajani, and N. Lambert. StackLLaMA: An RL fine-tuned LLaMA model for Stack Exchange question and answering, 2023. URL <https://huggingface.co/blog/stackllama>.
- R. Bommasani, D. A. Hudson, E. Adeli, R. Altman, S. Arora, S. von Arx, M. S. Bernstein, J. Bohg, A. Bosselut, E. Brunskill, E. Brynjolfsson, S. Buch, D. Card, R. Castellon, N. Chatterji, A. Chen, K. Creel, J. Q. Davis, D. Demszky, C. Donahue, M. Doumbouya, E. Durmus, S. Ermon, J. Etchemendy, K. Ethayarajh, L. Fei-Fei, C. Finn, T. Gale, L. Gillespie, K. Goel, N. Goodman, S. Grossman, N. Guha, T. Hashimoto, P. Henderson, J. Hewitt, D. E. Ho, J. Hong, K. Hsu, J. Huang, T. Icard, S. Jain, D. Jurafsky, P. Kalluri, S. Karamcheti, G. Keeling, F. Khani, O. Khattab, P. W. Koh, M. Krass, R. Krishna, R. Kuditipudi, A. Kumar, F. Ladhak, M. Lee, T. Lee, J. Leskovec, I. Levent, X. L. Li, X. Li, T. Ma, A. Malik, C. D. Manning, S. Mirchandani, E. Mitchell, Z. Munyikwa, S. Nair, A. Narayan, D. Narayanan, B. Newman, A. Nie, J. C. Niebles, H. Nilforoshan, J. Nyarko, G. Ogut, L. Orr, I. Papadimitriou, J. S. Park, C. Piech, E. Portelance, C. Potts, A. Raghunathan, R. Reich, H. Ren, F. Rong, Y. Roohani, C. Ruiz, J. Ryan, C. Ré, D. Sadigh, S. Sagawa, K. Santhanam, A. Shih, K. Srinivasan, A. Tamkin, R. Taori, A. W. Thomas, F. Tramèr, R. E. Wang, W. Wang, B. Wu, J. Wu, Y. Wu, S. M. Xie, M. Yasunaga, J. You, M. Zaharia, M. Zhang, T. Zhang, X. Zhang, Y. Zhang, L. Zheng, K. Zhou, and P. Liang. On the opportunities and risks of foundation models, 2022.
- S. Bubeck, V. Chandrasekaran, R. Eldan, J. Gehrke, E. Horvitz, E. Kamar, P. Lee, Y. T. Lee, Y. Li, S. Lundberg, et al. Sparks of artificial general intelligence: Early experiments with GPT-4. *arXiv preprint arXiv:2303.12712*, 2023.
- A. Bura, D. Rengarajan, D. Kalathil, S. Shakkottai, and J.-F. Chamberland. Learning to cache and caching to learn: Regret analysis of caching algorithms. *IEEE/ACM Transactions on Networking*, 30(1):18–31, 2021.
- W.-C. Chang, F. X. Yu, Y.-W. Chang, Y. Yang, and S. Kumar. Pre-training tasks for embedding-based large-scale retrieval, 2020.
- Z. Chang, L. Lei, Z. Zhou, S. Mao, and T. Ristaniemi. Learn to cache: Machine learning for network edge caching in the big data era. *IEEE Wireless Communications*, 25(3):28–35, 2018.
- C. Chen, S. Borgeaud, G. Irving, J.-B. Lespiau, L. Sifre, and J. Jumper. Accelerating large language model decoding with speculative sampling, 2023a.
- L. Chen, M. Zaharia, and J. Zou. Frugalgpt: How to use large language models while reducing cost and improving performance, 2023b.
- W.-L. Chiang, Z. Li, Z. Lin, Y. Sheng, Z. Wu, H. Zhang, L. Zheng, S. Zhuang, Y. Zhuang, J. E. Gonzalez, I. Stoica, and E. P. Xing. Vicuna: An open-source chatbot impressing GPT-4 with 90%\* ChatGPT quality, March 2023. URL <https://lmsys.org/blog/2023-03-30-vicuna/>.
- A. Chowdhery, S. Narang, J. Devlin, M. Bosma, G. Mishra, A. Roberts, P. Barham, H. W. Chung, C. Sutton, S. Gehrmann, et al. PaLM: Scaling language modeling with pathways. *arXiv preprint arXiv:2204.02311*, 2022.

333 J. Du, M. Ott, H. Li, X. Zhou, and V. Stoyanov. General purpose text embeddings from pre-trained  
334 language models for scalable inference, 2020.

335 F. Z. Faizal, P. Singh, N. Karamchandani, and S. Moharir. Regret-optimal online caching for  
336 adversarial and stochastic arrivals. In *Performance Evaluation Methodologies and Tools: 15th*  
337 *EAI International Conference, VALUETOOLS 2022, Virtual Event, November 2022, Proceedings*,  
338 pages 147–163. Springer, 2023.

339 W. Fedus, J. Dean, and B. Zoph. A review of sparse expert models in deep learning. *arXiv preprint*  
340 *arXiv:2209.01667*, 2022.

341 E. Frantar, S. Ashkboos, T. Hoefler, and D. Alistarh. Gptq: Accurate post-training quantization for  
342 generative pre-trained transformers, 2023.

343 A. Gholami, S. Kim, Z. Dong, Z. Yao, M. W. Mahoney, and K. Keutzer. A survey of quantization  
344 methods for efficient neural network inference, 2021.

345 Google. PaLM-2 technical report. 2023.

346 Y. He, Z. Zhang, F. R. Yu, N. Zhao, H. Yin, V. C. Leung, and Y. Zhang. Deep-reinforcement-learning-  
347 based optimization for cache-enabled opportunistic interference alignment wireless networks.  
348 *IEEE Transactions on Vehicular Technology*, 66(11):10433–10445, 2017.

349 W. Jiang, G. Feng, S. Qin, T. S. P. Yum, and G. Cao. Multi-agent reinforcement learning for efficient  
350 content caching in mobile d2d networks. *IEEE Transactions on Wireless Communications*, 18(3):  
351 1610–1622, 2019.

352 S. Jin and A. Bestavros. Popularity-aware greedy dual-size web proxy caching algorithms. In  
353 *Proceedings 20th IEEE International Conference on Distributed Computing Systems*, pages 254–  
354 261. IEEE, 2000.

355 Y. Jin, Z. Yang, and Z. Wang. Is pessimism provably efficient for offline RL? In *International*  
356 *Conference on Machine Learning*, pages 5084–5096. PMLR, 2021.

357 E. Kamalloo, X. Zhang, O. Ogundepo, N. Thakur, D. Alfonso-Hermelo, M. Rezagholizadeh, and  
358 J. Lin. Evaluating embedding apis for information retrieval, 2023.

359 S. Kim, K. Mangalam, J. Malik, M. W. Mahoney, A. Gholami, and K. Keutzer. Big little transformer  
360 decoder, 2023.

361 A. Köpf, Y. Kilcher, D. von Rütte, S. Anagnostidis, Z.-R. Tam, K. Stevens, A. Barhoum, N. M. Duc,  
362 O. Stanley, R. Nagyfi, et al. Openassistant conversations—democratizing large language model  
363 alignment. *arXiv preprint arXiv:2304.07327*, 2023.

364 S. Kumar and P. Singh. An overview of modern cache memory and performance analysis of  
365 replacement policies. In *2016 IEEE International Conference on Engineering and Technology*  
366 *(ICETECH)*, pages 210–214. IEEE, 2016.

367 D. Lee, J. Choi, J.-H. Kim, S. H. Noh, S. L. Min, Y. Cho, and C. S. Kim. Lrfu: A spectrum of policies  
368 that subsumes the least recently used and least frequently used policies. *IEEE transactions on*  
369 *Computers*, 50(12):1352–1361, 2001.

370 Y. Leviathan, M. Kalman, and Y. Matias. Fast inference from transformers via speculative decoding.  
371 *arXiv preprint arXiv:2211.17192*, 2022.

372 S. Mukhopadhyay and A. Sinha. Online caching with optimal switching regret. In *2021 IEEE*  
373 *International Symposium on Information Theory (ISIT)*, pages 1546–1551. IEEE, 2021.

374 H. Nori, N. King, S. M. McKinney, D. Carignan, and E. Horvitz. Capabilities of gpt-4 on medical  
375 challenge problems. *arXiv preprint arXiv:2303.13375*, 2023.

376 OpenAI. GPT-4 technical report. *arXiv preprint arXiv:2303.08774*, 2023.

377 L. Ouyang, J. Wu, X. Jiang, D. Almeida, C. L. Wainwright, P. Mishkin, C. Zhang, S. Agarwal,  
378 K. Slama, A. Ray, et al. Training language models to follow instructions with human feedback.  
379 *arXiv preprint arXiv:2203.02155*, 2022.

380 D. Paperno, G. Kruszewski, A. Lazaridou, Q. N. Pham, R. Bernardi, S. Pezzelle, M. Baroni, G. Boleda,  
381 and R. Fernández. The lambada dataset: Word prediction requiring a broad discourse context.  
382 *arXiv preprint arXiv:1606.06031*, 2016.

383 D. Patterson, J. Gonzalez, Q. Le, C. Liang, L.-M. Munguia, D. Rothchild, D. So, M. Texier, and  
384 J. Dean. Carbon emissions and large neural network training. *arXiv preprint arXiv:2104.10350*,  
385 2021.

386 P. Rashidinejad, B. Zhu, C. Ma, J. Jiao, and S. Russell. Bridging offline reinforcement learning and  
387 imitation learning: A tale of pessimism. *Advances in Neural Information Processing Systems*, 34:  
388 11702–11716, 2021.

389 P. Rigollet and J.-C. Hütter. High dimensional statistics. *Lecture notes for course 18S997*, 813(814):  
390 46, 2015.

391 J. Saad-Falcon, A. Singh, L. Soldaini, M. D’Arcy, A. Cohan, and D. Downey. Embedding recycling  
392 for language models, 2023.

393 T. Schuster, A. Fisch, J. Gupta, M. Dehghani, D. Bahri, V. Q. Tran, Y. Tay, and D. Metzler. Confident  
394 adaptive language modeling, 2022.

395 O. Sharir, B. Peleg, and Y. Shoham. The cost of training NLP models: A concise overview. *arXiv*  
396 *preprint arXiv:2004.08900*, 2020.

397 J. Shuja, K. Bilal, W. Alasmary, H. Sinky, and E. Alanazi. Applying machine learning techniques  
398 for caching in next-generation edge networks: A comprehensive survey. *Journal of Network and*  
399 *Computer Applications*, 181:103005, 2021.

400 A. J. Smith. Cache memories. *ACM Computing Surveys (CSUR)*, 14(3):473–530, 1982.

401 W. Stallings and G. K. Paul. *Operating systems: internals and design principles*, volume 9. Pearson  
402 New York, 2012.

403 J. Wang. A survey of web caching schemes for the internet. *ACM SIGCOMM Computer*  
404 *Communication Review*, 29(5):36–46, 1999.

405 J. Wei, Y. Tay, R. Bommasani, C. Raffel, B. Zoph, S. Borgeaud, D. Yogatama, M. Bosma, D. Zhou,  
406 D. Metzler, et al. Emergent abilities of large language models. *arXiv preprint arXiv:2206.07682*,  
407 2022a.

408 T. Wei, J. Qi, and S. He. A flexible multi-task model for bert serving, 2022b.

409 S. Zhang, S. Roller, N. Goyal, M. Artetxe, M. Chen, S. Chen, C. Dewan, M. Diab, X. Li, X. V. Lin,  
410 et al. Opt: Open pre-trained transformer language models. *arXiv preprint arXiv:2205.01068*, 2022.

411 C. Zhou, Q. Li, C. Li, J. Yu, Y. Liu, G. Wang, K. Zhang, C. Ji, Q. Yan, L. He, H. Peng, J. Li, J. Wu,  
412 Z. Liu, P. Xie, C. Xiong, J. Pei, P. S. Yu, and L. Sun. A comprehensive survey on pretrained  
413 foundation models: A history from bert to chatgpt, 2023.

414 D. M. Ziegler, N. Stiennon, J. Wu, T. B. Brown, A. Radford, D. Amodei, P. Christiano, and G. Irving.  
415 Fine-tuning language models from human preferences. *arXiv preprint arXiv:1909.08593*, 2019.

## Appendix

### A Discussions on the Choice of Output, Model and Cost

The proposed framework is flexible in the choice of outputs, models and costs. Below we discuss several possible choices and combinations of output, models and costs that are most practically relevant.

**Per-token Output and Per-sentence Output.** We have two design choices of the desired output in each round, namely per-token output and per-sentence output.

For per-token output, we aim at generating one token at each round as a response of the queries. In this case, we only cache the next token for a given query and estimate the cost for generating next token. We also have the flexibility of choosing different models to generate each token in each round.

For per-sentence output, we aim at generating a complete response at each round. In this case, we cache the whole responses for a given query, and estimate the cost for generating the whole responses. This may introduce more variance in the cost due to the variation and randomness in the length of the generated responses.

**Choices of Costs** The cost can be chosen as FLOPS, latency of the model, the price for API calls, user satisfaction of the results, or a combination of all the four factors.

**Model selection** A common choice of model ensembles is a pair of small and large models. The cost for small model  $C_s(q)$  can be written as  $C_s(q) = C_{s,0}(q) + Y(q)C_{s,1}(q)$ . Here  $Y(q)$  is a binary random variable, indicating whether the small model outputs satisfying results ( $Y(q) = 0$ ) or not ( $Y(q) = 1$ ). In the case when the small model outputs a satisfying response, the incurred cost is  $C_{s,0}(q)$ . In the case when the small model outputs a bad response, the incurred cost is  $C_{s,0}(q) + C_{s,1}(q)$ . We discuss two possible choices of  $Y(q)$ ,  $C_{s,0}(q)$  and  $C_{s,1}(q)$  based on two different evaluation pipeline as below.

- **One-time evaluation pipeline.** For the one-time evaluation pipeline, we can only call one of the models once and the generated content cannot be changed. In this case,  $C_{s,0}(q)$  can be set as the cost for running the small model to generate responses,  $Y(q)$  is set to be 1 if the user is not satisfied with the response, and  $C_{s,1}(q)$  is the incurred cost for unsatisfactory of the user. One can similarly set the same cost for the large model.
- **Correction-based evaluation pipeline.** For correction-based evaluation, we may re-generate the content with a different model if it is unsatisfying, and get an extra cost for fixing the content. Such evaluation can be easily combined with LLM Cascade (Frantar et al., 2023) or the idea from Big Little Transformer Decoder (Kim et al., 2023) and Speculative sampling (Chen et al., 2023a). For example, after running the small model, we run the large model once to infer all the log probabilities of the small model output in parallel, and reject its output if the log probabilities are low. If the small model output is rejected, we will set  $Y(q) = 1$  and run large model to re-generate the responses. In this case,  $C_{s,0}(q)$  is the cost of running the small model for generating responses, and running the large model once for checking the probability. And  $C_{s,1}(q)$  is the cost of running the large model to generate the response.

We also remark here that in the special case when the cost for the small model is much smaller than that of the large model under the correction-based evaluation pipeline, the cascade selector which always runs the small model first may give better performance than model selector if the accuracy of the model selector is low, since running small model does not introduce too much cost compared to running large model. In this situation, the cascade selector can also be combined with LEC caching to further improve the performance.

On the other hand, we may also choose among models with similar size but different expertise, including coding, summarization and chat etc. In this case, we also expect to see different qualities and cost of responses for specific queries.

## B Generalization to Variable Size Cache

For the variable-size caching problem, assume that the cache size of  $q$  is a deterministic scalar, denoted as  $S(q)$ . In the population case we design the cache as follows:

$$\mathcal{L}^* = \arg \min_{\mathcal{L}: \sum_{q \in \mathcal{L}} S(q) \leq L} \sum_{q \in \mathcal{Q}} P(q) \mathbb{1}(q \notin \mathcal{L}) \min(c_s^*(q), c_l^*(q)).$$

In the case when all  $S, P, c_s^*, c_l^*$  are known, one may solve the above constrained optimization problem for the optimal caching. When  $S(q) \ll L$ , a good cache replacement algorithm is GDSF itself, which replaces the query with the smallest expected cost per-size  $P(q) \min(c_s^*(q), c_l^*(q)) / S(q)$  rather than expected cost per-query.

A more practical setting is the case when the cache size for each query  $S(q)$  is a random variable. Due to the randomness in the generation procedure, we expect to see responses of different lengths even when we use the same model to process the same query. In each round, we will have a generated response with size  $s(q)$  that is sampled from the random variable  $S(q_t)$ . We conjecture that the optimal cache replacement algorithm is to replace the query with the smallest expected cost per-size  $P(q) \min(c_s^*(q), c_l^*(q)) / s(q)$  as well, where  $s(q)$  is the size of the cached queries and responses.

## C Generalization to Selection from Multiple Models

The proposed algorithm can be generalized to model selection with multiple models. Assume that we have  $K$  models, and each model has a random cost function  $C_k(q)$  with expectation  $c_k^*(q)$ . In this case, the optimal population algorithm is

$$\begin{aligned} \pi^*(q) &= \arg \min_{k \in [K]} c_k^*(q), \\ \mathcal{L}^* &= \arg \min_{\mathcal{L}: |\mathcal{L}| \leq L} \sum_{q \in \mathcal{Q}} P(q) \mathbb{1}(q \notin \mathcal{L}) \min_{k \in [K]} c_k^*(q). \end{aligned}$$

And the finite sample algorithm is natural to follow. In practice, one may train a neural network with  $K$  dimensional output to predict the cost for each of the models.

## D Differences between the optimal policy and the baseline

Consider the population setting in Section 3, where we optimize caching without model selection. We show via a simple example below that without considering the cost for individual query, LFU can be highly sub-optimal compared to the optimal caching strategy in the population. The ratio

**Proposition 1.** *For any fixed cost function  $c_l^*$ , one can design some distribution of queries  $P$  such that for any  $\epsilon > 0$ ,*

$$\frac{\text{cost}(\mathcal{L}_{\text{LFU}})}{\text{cost}(\mathcal{L}_{\text{LEC}})} \geq \frac{\max_{q \in \mathcal{Q}} c_l^*(q)}{\min_{q \in \mathcal{Q}} c_l^*(q)} - \epsilon.$$

The construction can be seen from a two-query example. Let  $c_l^*(q_1) = c_1, c_l^*(q_2) = c_2$  with  $c_1 < c_2$ . Let  $P(q_1) = p, P(q_2) = 1-p$ . This shows that when the individual cost varies drastically for different queries, the total expected cost for LFU can be highly sub-optimal compared with the cost-aware caching strategy.

To compare the performance of the model selection in Section 4, we take the cache size  $L = 0$ . We have the following proposition for the performance improvement of the model selector.

**Proposition 2.** *Let  $L = 0$ . The difference in cost between the baseline and the model selector can be written as*

$$\begin{aligned} \text{cost}(\mathcal{L}^*, \pi_s) - \text{cost}(\mathcal{L}^*, \pi^*) &= \sum_{q \in \mathcal{Q}} P(q) \max(0, c_s^*(q) - c_l^*(q)), \\ \text{cost}(\mathcal{L}^*, \pi_l) - \text{cost}(\mathcal{L}^*, \pi^*) &= \sum_{q \in \mathcal{Q}} P(q) \max(0, c_l^*(q) - c_s^*(q)). \end{aligned}$$

497 The proof is a direct result of plugging in the cost definition. We see that the gap between  $\pi_s$  and the  
 498 optimal model selector becomes larger when a large fraction of the queries have smaller cost when  
 499 processed by the large models, and vice versa.

## 500 E Proof of Theorem 1

501 *Proof.* We first prove the following lemma on the lower bound of  $P(q)$  for any  $q \in \mathcal{L}^*$ .

502 **Lemma 1.** *For any  $q \in \mathcal{L}^*$ , we have  $P(q) \geq B_1/(B_2|\mathcal{Q}|)$ .*

503 *Proof.* From the fact that  $\sum_{q \in \mathcal{Q}} P(q) = 1$  and for any  $q \in \mathcal{L}^*$  and any  $q' \notin \mathcal{L}^*$ ,  $P(q) \geq$   
 504  $P(q')c_l^*(q')/c_l^*(q) \geq P(q')B_1/B_2$ , we know that for any  $q \in \mathcal{L}^*$ ,  $P(q) \geq B_1/(B_2|\mathcal{Q}|)$ .  $\square$

505 We define the following three events:

$$\begin{aligned} E_1 &= \left\{ \forall q \in \mathcal{Q}, |\hat{P}(q) - P(q)| \leq \sqrt{\frac{2\log(6/\delta)}{N}} \right\}, \\ E_2 &= \left\{ \forall q \in \mathcal{Q}, |\hat{c}_l(q) - c_l^*(q)| \leq (B_2 - B_1) \sqrt{\frac{\log(6|\mathcal{Q}|/\delta)}{2 \sum_{n=1}^N \mathbb{1}(q_n = q)}} \right\}, \\ E_3 &= \left\{ \forall q \in \mathcal{L}^*, \sum_{n=1}^N \mathbb{1}(q_n = q) \geq \frac{B_1 N}{2B_2|\mathcal{Q}|} \right\}. \end{aligned}$$

506 We know that the first two events hold simultaneously with probability at least  $1 - 2\delta/3$  from Lemma 3.  
 507 For the third event, from the Chernoff bound, we know that for any  $q \in \mathcal{Q}$ , we have

$$\mathbb{P} \left( \sum_{n=1}^N \mathbb{1}(q_n = q) \geq NP(q)/2 \right) \geq 1 - \exp(-NP(q)/8).$$

508 From Lemma 1 we know that for any  $q \in \mathcal{L}^*$ ,  $P(q) \geq B_1/(B_2|\mathcal{Q}|)$ . Thus the above inequality  
 509 further implies

$$\mathbb{P} \left( \sum_{n=1}^N \mathbb{1}(q_n = q) \geq \frac{B_1 N}{2B_2|\mathcal{Q}|} \right) \geq 1 - \exp \left( -\frac{B_1 N}{8B_2|\mathcal{Q}|} \right) \geq 1 - \frac{\delta}{3L}.$$

510 The last inequality is due to our assumption that  $N \geq \frac{8B_2|\mathcal{Q}|\log(3L/\delta)}{B_1}$ .

511 We condition on the three events from now on. The last two events imply that for any  $q \in \mathcal{L}^*$ ,

$$|\hat{c}_l(q) - c_l^*(q)| \leq (B_2 - B_1) \sqrt{\frac{B_2|\mathcal{Q}|\log(6|\mathcal{Q}|/\delta)}{NB_1}}.$$

512 We have

$$\begin{aligned} \text{cost}(\hat{\mathcal{L}}) - \text{cost}(\mathcal{L}^*) &= \sum_{q \in \mathcal{Q}} P(q) \left( \mathbb{1}(q \notin \hat{\mathcal{L}}) - \mathbb{1}(q \notin \mathcal{L}^*) \right) c_l^*(q) \\ &= \sum_{q \in \mathcal{Q}} P(q) \left( \mathbb{1}(q \in \mathcal{L}^*) - \mathbb{1}(q \in \hat{\mathcal{L}}) \right) c_l^*(q). \end{aligned}$$

513 Let  $\hat{c}_{l,pes}(q) = \hat{c}_l(q) - (B_2 - B_1) \sqrt{\frac{\log(6|\mathcal{Q}|/\delta)}{2 \sum_{n=1}^N \mathbb{1}(q_n = q)}}$ . Note that for any  $q \in \mathcal{L}^*$ , we know that

$$\begin{aligned} \hat{P}(q)\hat{c}_{l,pes}(q) &\geq \max \left( P(q) - \sqrt{\frac{2\log(6/\delta)}{N}}, 0 \right) \left( c_l^*(q) - 2(B_2 - B_1) \sqrt{\frac{B_2|\mathcal{Q}|\log(6|\mathcal{Q}|/\delta)}{NB_1}} \right) \\ &\geq P(q)c_l^*(q) - C(B_2 - B_1) \cdot \sqrt{\frac{B_2|\mathcal{Q}|\log(6|\mathcal{Q}|/\delta)}{NB_1}}. \end{aligned}$$

514 And similarly, for any  $q \notin \mathcal{L}^*$ , we know that

$$\hat{P}(q)\hat{c}_{l, pes}(q) \leq \left( P(q) + \sqrt{\frac{2 \log(6/\delta)}{N}} \right) c_l^*(q) \leq P(q)c_l^*(q) + B_2 \sqrt{\frac{2 \log(6/\delta)}{N}}.$$

515 Now consider any  $q \in \hat{\mathcal{L}}$  but  $q \notin \mathcal{L}^*$ , and any other  $q' \in \mathcal{L}^*$  but  $q' \notin \hat{\mathcal{L}}$ . We have

$$\begin{aligned} & P(q')c_l^*(q') - P(q)c_l^*(q) \\ & \leq \hat{P}(q')\hat{c}_{l, pes}(q') - \hat{P}(q)\hat{c}_{l, pes}(q) + C(B_2 - B_1) \cdot \sqrt{\frac{B_2|\mathcal{Q}| \log(6|\mathcal{Q}|/\delta)}{NB_1}} \\ & \leq C(B_2 - B_1) \cdot \sqrt{\frac{B_2|\mathcal{Q}| \log(6|\mathcal{Q}|/\delta)}{NB_1}}. \end{aligned}$$

516 Overall, we know that conditioned on  $E_1 \cap E_2 \cap E_3$ , we have

$$\text{cost}(\hat{\mathcal{L}}) - \text{cost}(\mathcal{L}^*) \leq C(B_2 - B_1)L \cdot \sqrt{\frac{B_2|\mathcal{Q}| \log(6|\mathcal{Q}|/\delta)}{NB_1}}.$$

517 And this implies that

$$\mathbb{E}[\text{cost}(\hat{\mathcal{L}}) - \text{cost}(\mathcal{L}^*)] \leq C(B_2 - B_1)L \cdot \sqrt{\frac{B_2|\mathcal{Q}| \log(6|\mathcal{Q}|/\delta)}{NB_1}} + \delta B_2.$$

518 Taking  $\delta = 1/N$  finishes the proof.  $\square$

## 519 F Proof of Theorem 2

520 *Proof. Upper Bound.* We start with the upper bound by the following lemma.

521 **Lemma 2.** *In each round  $t \in [T]$ , we always have*

$$\mathcal{L}_{t+1} \in \arg \min_{\mathcal{L}} \sum_{q \in \mathcal{Q}} \hat{P}_t(q) \mathbb{1}(q \notin \mathcal{L}) \hat{c}_{l, t}(q).$$

522 *Proof.* We prove this lemma by induction. First, consider the case when  $|\mathcal{L}_{t+1}| < L$ . In this scenario,  
523 we always put the query into the cache. And  $\mathcal{L}_{t+1}$  contains all queries with non-zero  $\hat{P}_t$ . Thus such  
524  $\mathcal{L}_{t+1}$  is always one of the minimizers.

525 Now consider the case when  $|\mathcal{L}_{t+1}| = L$ . Assume that the conclusion holds for time step  $t$ . Now  
526 consider the case of  $t + 2$ . When the new query is in the cache  $q_{t+1} \in \mathcal{L}_{t+1}$ , the cache will remain  
527 unchanged  $\mathcal{L}_{t+2} = \mathcal{L}_{t+1}$ . In this case, the estimated probability for  $q_{t+1}$  is increased, while the  
528 others are decreased, and  $\hat{c}_{l, t+1}$  is not changed for any query. Thus  $\mathcal{L}_{t+2}$  is still the minimizer. When  
529 the new query does not hit the cache, the estimated probability times costs for all other queries  
530 except for  $q_{t+1}$  are decreased proportionally since  $\hat{P}_{t+1}$  is decreased proportionally while  $\hat{c}_{l, t+1}$   
531 is not changed for all other queries. Thus the only potential change in the relative order of costs is that  
532 of  $q_{t+1}$ . Since we can add  $q_{t+1}$  at the end of query, we know that after this round  $\mathcal{L}_{t+2}$  is still the  
533 minimizer.  $\square$

534 Let  $g_k(q)$  be the length of the interval between the  $k$ -th and  $k + 1$ -th arrival of query  $q$  in the sequence  
535 of received queries (we set  $g_k(q) = 0$  if  $k$  exceeds the total number of times  $q$  is queried.). Define the  
536 following three events:

$$\begin{aligned} E_{1,t} &= \left\{ \forall q \in \mathcal{Q}, |\hat{P}_{t-1}(q) - P(q)| \leq \min \left( 1, \sqrt{\frac{2 \log(6T/\delta)}{t-1}} \right) \right\}, \\ E_{2,t} &= \left\{ \forall q \in \mathcal{Q}, \hat{c}_{l, t-1}(q) - c_l^*(q) \in \left[ -2(B_2 - B_1) \min \left( 1, \sqrt{\frac{\log(6T|\mathcal{Q}|/\delta)}{2 \sum_{i=1}^{t-1} \mathbb{1}(c_i \neq \times, q_i = q)}}, 0 \right) \right] \right\}, \\ E_3 &= \left\{ \forall q \in \mathcal{L}^*, k \leq T, g_k(q) \leq \frac{B_2|\mathcal{Q}| \log(3TL/\delta)}{B_1} \right\}. \end{aligned}$$

537 We prove that the three events hold simultaneously with probability at least  $1 - \delta$ :



**Lemma 3.** *We have*

$$\mathbb{P} \left( \left( \bigcap_{t=T^{2/3}}^T E_{1,t} \cap E_{2,t} \right) \cap E_3 \right) \geq 1 - \delta.$$

538 *Proof.* From Dvoretzky-Kiefer-Wolfowitz inequality, we have

$$\mathbb{P}(\max_{q \in \mathcal{Q}} |\hat{P}_t(q) - P(q)| > \epsilon) \leq 2 \exp(-\epsilon^2 t/2).$$

539 By taking  $\epsilon = \sqrt{\frac{2 \log(6T/\delta)}{t}}$ , we see that  $\max_{q \in \mathcal{Q}} |\hat{P}_t(q) - P(q)| \leq \epsilon$  holds with probability at  
 540 least  $1 - \delta/(3T)$  for any fixed  $t \in [T]$ . Now by taking union bound over all  $t \in [T]$ , we know that  
 541  $\bigcap_{t=1}^T E_{1,t}$  holds with probability at least  $1 - \delta/3$ .

For the second event, from Hoeffding's inequality, we have for any  $q \in \mathcal{Q}$ ,

$$\mathbb{P} \left( |\hat{c}_{l,t}(q) - c_l^*(q)| \leq (B_2 - B_1) \min \left( 1, \sqrt{\frac{\log(6T|\mathcal{Q}|/\delta)}{2 \sum_{s=1}^{t-1} \mathbb{1}(c_s \neq \times, q_s = q)} \right) \right) \geq 1 - \frac{\delta}{3T|\mathcal{Q}|}.$$

542 Now taking union bound over  $t \in [T]$  and  $q \in \mathcal{Q}$  gives that  $\bigcap_{t=1}^T E_{2,t}$  holds with probability at least  
 543  $1 - \delta/3$ .

544 For the third event, we know that the interval  $g_k(q)$  satisfies a geometric distribution with success  
 545 probability  $P(q)$ . For any  $q \in \mathcal{L}^*$ , we have

$$\mathbb{P}(g_k(q) \geq s) \leq (1 - P(q))^s \leq (1 - \frac{B_1}{|\mathcal{Q}|B_2})^s.$$

546 By taking  $s = \frac{B_2|\mathcal{Q}| \log(TL/\delta)}{B_1}$ , we know that

$$\mathbb{P} \left( g_k(q) \geq \frac{B_2|\mathcal{Q}| \log(3TL/\delta)}{B_1} \right) \leq (1 - \frac{B_1}{|\mathcal{Q}|B_2})^s \leq \frac{\delta}{3TL}.$$

547 By taking union bounds over all  $q \in \mathcal{L}^*$  and  $k$  we get the result.  $\square$

548 Let  $E^t = \bigcap_{s=1}^t E_{1,s} \cap E_{2,s}$ . We can write the regret as follows.

$$\begin{aligned} \text{Regret}(T) &\leq \sum_{t=1}^T \mathbb{E}[\text{cost}(q_t, \mathcal{L}_t) - \text{cost}(q_t, \mathcal{L}^*) \mathbb{1}(E^t)] + \mathbb{E}[\text{cost}(q_t, \mathcal{L}_t) - \text{cost}(q_t, \mathcal{L}^*) \mathbb{1}(\bar{E}^t)] \\ &\leq \sum_{t=1}^T \mathbb{E}[\text{cost}(q_t, \mathcal{L}_t) - \text{cost}(q_t, \mathcal{L}^*) \mathbb{1}(E^t)] + C\delta T B_2 \\ &= C\delta T B_2 + \sum_{t=1}^T \mathbb{E}[\text{cost}(q_t, \mathcal{L}_t) - \text{cost}(q_t, \mathcal{L}^*) \mathbb{1}(E^t)]. \end{aligned}$$

549 Note that the sampling distribution of  $q_t$  is independent of  $E^t$ . Thus we can write the expectation as

$$\sum_{t=1}^T \mathbb{E}[\text{cost}(q_t, \mathcal{L}_t) - \text{cost}(q_t, \mathcal{L}^*) \mathbb{1}(E^t)] \leq \sum_{t=1}^T \sum_{q \in \mathcal{Q}} \mathbb{E}[P(q) (\mathbb{1}(q \notin \mathcal{L}_t) - \mathbb{1}(q \notin \mathcal{L}^*)) c_l^*(q) | E^t]$$

550 Let  $T_t(q) = \sum_{i=1}^{t-1} \mathbb{1}(q_i \notin \mathcal{L}_i, q_i = q)$ . Note that the event  $c_i = \times$  is equivalent to that  $q_i \in \mathcal{L}_i$ . Now  
 551 at each round  $t$ , conditioned on event  $E^t$ , we know that for any  $q \in \mathcal{L}^*$ ,

$$\begin{aligned} \hat{P}_{t-1}(q) \hat{c}_{l,t-1}(q) &\geq \max \left( P(q) - \min \left( 1, \sqrt{\frac{2 \log(6T/\delta)}{t-1}} \right), 0 \right) \left( c_l^*(q) - 2(B_2 - B_1) \cdot \min \left( 1, \sqrt{\frac{\log(6T|\mathcal{Q}|/\delta)}{T_t(q)}} \right) \right) \\ &\geq P(q) c_l^*(q) - C(B_2 - B_1) \cdot \min \left( 1, \sqrt{\frac{\log(6T|\mathcal{Q}|/\delta)}{T_t(q)}} \right). \end{aligned}$$

552 And similarly, for any  $q \notin \mathcal{L}^*$ , we know that

$$\hat{P}_t(q)\hat{c}_{l,t-1}(q) \leq \left( P(q) + \min \left( 1, \sqrt{\frac{2\log(8T/\delta)}{t-1}} \right) \right) c_l^*(q) \leq P(q)c_l^*(q) + B_2 \min \left( 1, \sqrt{\frac{2\log(8T/\delta)}{t-1}} \right).$$

553 Now consider any  $q \in \mathcal{L}_t$  but  $q \notin \mathcal{L}^*$ , and any other  $q' \in \mathcal{L}^*$  but  $q' \notin \mathcal{L}_t$ . We have

$$\begin{aligned} & P(q')c_l^*(q') - P(q)c_l^*(q) \\ & \leq \hat{P}(q')\hat{c}_{l,t-1}(q') - \hat{P}(q)\hat{c}_{l,t-1}(q) + C(B_2 - B_1) \cdot \min \left( 1, \sqrt{\frac{\log(6T|\mathcal{Q}|/\delta)}{T_t(q)}} \right) + B_2 \min \left( 1, \sqrt{\frac{2\log(6T/\delta)}{t-1}} \right) \\ & \leq C(B_2 - B_1) \cdot \min \left( 1, \sqrt{\frac{\log(6T|\mathcal{Q}|/\delta)}{T_t(q)}} \right) + B_2 \min \left( 1, \sqrt{\frac{2\log(8T/\delta)}{t-1}} \right). \end{aligned}$$

554 Thus we know that

$$\begin{aligned} & \sum_{t=1}^T \mathbb{E}[\text{cost}(q_t, \mathcal{L}_t) - \text{cost}(q_t, \mathcal{L}^*) \mathbb{1}(E^t)] \\ & \leq C \sum_{t=1}^T \mathbb{E} \left[ \sum_{q \in \mathcal{L}^*} \mathbb{1}(q \notin \mathcal{L}_t) (B_2 - B_1) \cdot \min \left( 1, \sqrt{\frac{\log(6T|\mathcal{Q}|/\delta)}{T_t(q)}} \right) + B_2 \min \left( 1, \sqrt{\frac{2\log(6T/\delta)}{t-1}} \right) \mid E^t \right]. \end{aligned}$$

555 Thus we have

$$\begin{aligned} & \sum_{t=1}^T \mathbb{E}[\text{cost}(q_t, \mathcal{L}_t) - \text{cost}(q_t, \mathcal{L}^*) \mathbb{1}(E^t)] \\ & \leq B_2 T \delta + C \sum_{t=1}^T \mathbb{E} \left[ \sum_{q \in \mathcal{L}^*} \mathbb{1}(q \notin \mathcal{L}_t) (B_2 - B_1) \cdot \min \left( 1, \sqrt{\frac{\log(6T|\mathcal{Q}|/\delta)}{T_t(q)}} \right) \right. \\ & \quad \left. + B_2 \min \left( 1, \sqrt{\frac{2\log(6T/\delta)}{t-1}} \right) \mid E^t \cap E_3 \right] \\ & \leq C \cdot \left( B_2 T \delta + L B_2 \sqrt{2T \log(6T/\delta)} \right. \\ & \quad \left. + (B_2 - B_1) \log(6T|\mathcal{Q}|/\delta) \cdot \sum_{q \in \mathcal{L}^*} \sum_{t=1}^T \mathbb{E} \left[ \mathbb{1}(q \notin \mathcal{L}_t) \cdot \min \left( 1, \sqrt{\frac{1}{T_t(q)}} \right) \mid E^t \cap E_3 \right] \right). \end{aligned}$$

556 Now for each  $q \in \mathcal{L}^*$ , we look at the term  $\sum_{t=1}^T \mathbb{E} \left[ \mathbb{1}(q \notin \mathcal{L}_t) \cdot \min \left( 1, \sqrt{\frac{1}{T_t(q)}} \right) \mid E^t \cap E_3 \right]$ . We

557 prove the following lemma:

558 **Lemma 4.** *We have*

$$\sum_{t=1}^T \mathbb{E} \left[ \mathbb{1}(q \notin \mathcal{L}_t) \cdot \min \left( 1, \sqrt{\frac{1}{T_t(q)}} \right) \mid E^t \cap E_3 \right] \leq \frac{C B_2 |\mathcal{Q}| \log(3TL/\delta) \sqrt{T}}{B_1} + \delta.$$

559 *Proof.* Let  $t_k(q) = \sum_{l=1}^{k-1} g_l(q)$  be the step that the  $k$ -th query of  $q$  arrives. And let  $E = (\bigcap_{t=1}^T E_t) \cap$   
 560  $E_3$ . The summation can be written as

$$\begin{aligned} & \sum_{t=1}^T \mathbb{E} \left[ \mathbb{1}(q \notin \mathcal{L}_t) \cdot \sqrt{\frac{1}{T_t(q)}} \mid E^t \cap E_3 \right] \\ & \leq \sum_{t=1}^T \mathbb{E} \left[ \mathbb{1}(q \notin \mathcal{L}_t) \cdot \sqrt{\frac{1}{T_t(q)}} \mid E \right] + \delta \\ & = \sum_{k=0}^T \mathbb{E} \left[ \sum_{t=t_k(q)+1}^{t_{k+1}(q)} \mathbb{1}(q \notin \mathcal{L}_t) \cdot \sqrt{\frac{1}{T_t(q)}} \mid E \right] \\ & \leq \sum_{k=0}^T \mathbb{E} \left[ \sum_{t=t_k(q)+1}^{t_{k+1}(q)} \mathbb{1}(q \notin \mathcal{L}_{t_{k+1}(q)}) \cdot \sqrt{\frac{1}{T_{t_k(q)+1}(q)}} \mid E \right]. \end{aligned}$$

561 The last inequality is due to (a).  $T_t(q)$  does not change if at round  $t$  the query is not  $q$ ; (b). if  
 562  $q \in \mathcal{L}_{t_{k+1}(q)}$ , we will have  $q \in \mathcal{L}_t$  for any  $t \in [t_k(q) + 1, t_{k+1}(q)]$  since  $q$  never arrives in the middle  
 563 and must remain in the cache set until  $t_{k+1}(q)$ . Now from event  $E_3$ , we know that

$$\begin{aligned} & \sum_{k=0}^T \mathbb{E} \left[ \sum_{t=t_k(q)+1}^{t_{k+1}(q)} \mathbb{1}(q \notin \mathcal{L}_{t_{k+1}(q)}) \cdot \sqrt{\frac{1}{T_{t_k(q)+1}(q)}} \mid E \right] \\ & \leq \sum_{k=0}^T \mathbb{E} \left[ \mathbb{1}(q \notin \mathcal{L}_{t_{k+1}(q)}) \cdot g_k(q) \cdot \sqrt{\frac{1}{T_{t_k(q)+1}(q)}} \mid E \right] \\ & \leq \frac{B_2 |\mathcal{Q}| \log(3TL/\delta)}{B_1} \cdot \sum_{k=0}^T \mathbb{E} \left[ \mathbb{1}(q \notin \mathcal{L}_{t_{k+1}(q)}) \cdot \sqrt{\frac{1}{T_{t_k(q)+1}(q)}} \mid E \right] \end{aligned}$$

564 We know that  $T_{t_{k+1}(q)+1}(q) = T_{t_{k+1}(q)}(q) + 1 = T_{t_k(q)+1}(q) + 1$  if  $q \notin \mathcal{L}_{t_{k+1}(q)}$  since the  
 565 query  $q$  missing the cache will be sent to the model. Thus overall, we know that we have either  
 566  $T_{t_{k+1}(q)+1}(q) = T_{t_k(q)+1}(q) + 1$ , or  $\mathbb{1}(q \notin \mathcal{L}_{t_{k+1}(q)}) \cdot \sqrt{\frac{1}{T_{t_k(q)+1}(q)}} = 0$  and  $T_{t_{k+1}(q)+1}(q) =$   
 567  $T_{t_k(q)+1}(q)$ . Thus overall, we have

$$\sum_{k=0}^T \mathbb{E} \left[ \mathbb{1}(q \notin \mathcal{L}_{t_{k+1}(q)}) \cdot \sqrt{\frac{1}{T_{t_k(q)+1}(q)}} \mid E \right] \leq \sum_{k=1}^T \frac{1}{\sqrt{k}} \leq C\sqrt{T}.$$

568 □

569 By taking  $\delta = 1/T$ , we know the final regret can be bounded by

$$\text{Regret}(T) \leq \frac{CL(B_2 - B_1)B_2 |\mathcal{Q}| L \log^2(T|\mathcal{Q}|)}{B_1} \cdot \sqrt{T}.$$

570 **Lower bound.** Now we turn to the lower bound. We apply Le Cam's two point lemma for the regret.  
 571 Consider any family of algorithm  $\{\mathcal{L}_t\}_{t=1}^T$ , where  $\mathcal{L}_t$  can be dependent on observations prior to time  
 572 step  $t$ . We aim to design two instances with the same  $P(q)$  and different random variable  $C_l(q)$  such  
 573 that for any algorithm, the incurred cost for one of the instance is at least  $\Omega(\sqrt{T})$ . Consider the  
 574 case when we only have two candidate queries  $\mathcal{Q} = \{q_1, q_2\}$ . Set  $P(q_1) = P(q_2) = 1/2$  for both  
 575 instances and the cache size  $L = 1$ . For instance one, we let  $C_l^{(1)}(q_1) \sim \text{Bern}(1/2)$ ,  $C_l^{(1)}(q_2) \sim$   
 576  $\text{Bern}(1/2 + \Delta)$ . For instance two, we let  $C_l^{(2)}(q_1) \sim \text{Bern}(1/2)$ ,  $C_l^{(2)}(q_2) \sim \text{Bern}(1/2 - \Delta)$ . We  
 577 have

$$\begin{aligned} \inf_{\{\mathcal{L}_t\}_{t=1}^T} \sup_{P, C_l} \text{Regret}(T) & \geq \inf_{\{\mathcal{L}_t\}_{t=1}^T} \sup_{C_l \in \{C_l^{(1)}, C_l^{(2)}\}} \text{Regret}(T) \\ & = \inf_{\{\mathcal{L}_t\}_{t=1}^T} \sup_{C_l \in \{C_l^{(1)}, C_l^{(2)}\}} \sum_{t=1}^T \mathbb{E} \left[ \frac{1}{2} \sum_{i=1}^2 \mathbb{1}(q_i \notin \mathcal{L}_t) c_l^*(q_i) - \frac{1}{2} \sum_{i=1}^2 \mathbb{1}(q_i \notin \mathcal{L}^*) c_l^*(q_i) \right]. \end{aligned}$$

Let  $\text{Regret}^{(1)}(T)$  be the total regret when  $C_l = C_l^{(1)}$ , and  $\text{Regret}^{(2)}(T)$  be the total regret when  $C_l = C_l^{(2)}$ . Then we can verify that for any sequence of  $\mathcal{L}_t$ ,

$$\text{Regret}^{(1)}(T) + \text{Regret}^{(2)}(T) \geq \frac{\Delta T}{2}.$$

Thus from Le Cam's Lemma, we have

$$\begin{aligned} \inf_{\{\mathcal{L}_t\}_{t=1}^T} \sup_{P, C_l} \text{Regret}(T) &\geq \frac{\Delta T}{4} \cdot (1 - \text{TV}(\mathbb{P}_{C_l^{(1)}}, \mathbb{P}_{C_l^{(2)}})) \\ &\geq \frac{\Delta T}{8} \cdot \exp(-D_{\text{KL}}(\mathbb{P}_{C_l^{(1)}}, \mathbb{P}_{C_l^{(2)}})) \\ &\geq \frac{\Delta T}{8} \cdot \exp(-2\Delta^2 \mathbb{E}_1[T_2]). \end{aligned}$$

Here  $\mathbb{E}_1[T_2]$  is the expected times of observing the cost of  $q_2$  under instance one. Taking  $\Delta = T^{-1/2}$  and minimizing the above equation with  $\mathbb{E}_1[T_2]$  gives the desired bound.  $\square$

### G Proof of Theorem 3

*Proof.* We define the following four events:

$$\begin{aligned} E_1 &= \left\{ \forall q \in \mathcal{Q}, |\hat{P}(q) - P(q)| \leq \sqrt{\frac{2 \log(8/\delta)}{N}} \right\}, \\ E_2 &= \left\{ \forall q \in \mathcal{Q}, |\hat{c}_l(q) - c_l^*(q)| \leq (B_2 - B_1) \sqrt{\frac{\log(8|\mathcal{Q}|/\delta)}{2 \sum_{n=1}^N \mathbb{1}(q_n = q)}} \right\}, \\ E_3 &= \left\{ \forall q \in \mathcal{Q}, |\hat{c}_s(q) - c_s^*(q)| \leq (B_2 - B_1) \sqrt{\frac{\log(8|\mathcal{Q}|/\delta)}{2 \sum_{n=1}^N \mathbb{1}(q_n = q)}} \right\}, \\ E_4 &= \left\{ \forall q \in \mathcal{L}^*, \sum_{n=1}^N \mathbb{1}(q_n = q) \geq N \cdot P(q)/2 \right\}. \end{aligned}$$

We know that the above events hold simultaneously with probability at least  $1 - \delta$  from Lemma 3. We condition on the four events from now on. We first decompose the cost difference as

$$\text{cost}(\hat{\mathcal{L}}, \hat{\pi}) - \text{cost}(\mathcal{L}^*, \pi^*) = \text{cost}(\hat{\mathcal{L}}, \hat{\pi}) - \text{cost}(\hat{\mathcal{L}}, \pi^*) + \text{cost}(\hat{\mathcal{L}}, \pi^*) - \text{cost}(\mathcal{L}^*, \pi^*).$$

The first difference can be further written as

$$\begin{aligned} \text{cost}(\hat{\mathcal{L}}, \hat{\pi}) - \text{cost}(\hat{\mathcal{L}}, \pi^*) &= \sum_{q \in \mathcal{Q}} P(q) \mathbb{1}(q \notin \hat{\mathcal{L}}) (c_s^*(q) \hat{\pi}(q) + c_l^*(q) (1 - \hat{\pi}(q)) - c_s^*(q) \pi^*(q) - c_l^*(q) (1 - \pi^*(q))) \\ &= \sum_{q \in \mathcal{Q}} P(q) \mathbb{1}(q \notin \hat{\mathcal{L}}) (c_s^*(q) \hat{\pi}(q) + c_l^*(q) (1 - \hat{\pi}(q)) - \min(c_s^*(q), c_l^*(q))) \\ &\leq \sum_{q \in \mathcal{Q}} P(q) (c_s^*(q) \hat{\pi}(q) + c_l^*(q) (1 - \hat{\pi}(q)) - \min(c_s^*(q), c_l^*(q))) \\ &= \sum_{q \in \mathcal{Q}} P(q) (c_s^*(q) \mathbb{1}(\hat{c}_s(q) \leq \hat{c}_l(q)) + c_l^*(q) \mathbb{1}(\hat{c}_s(q) > \hat{c}_l(q)) - \min(c_s^*(q), c_l^*(q))). \end{aligned}$$

Note that if  $\hat{c}_s(q) - \hat{c}_l(q)$  has the same sign as  $c_s^*(q) - c_l^*(q)$ , the difference  $c_s^*(q) \mathbb{1}(\hat{c}_s(q) \leq \hat{c}_l(q)) + c_l^*(q) \mathbb{1}(\hat{c}_s(q) > \hat{c}_l(q)) - \min(c_s^*(q), c_l^*(q))$  becomes 0. Otherwise, if  $c_s^*(q) - c_l^*(q) > 0$ , we know that

$$c_s^*(q) - c_l^*(q) \leq \hat{c}_s(q) - \hat{c}_l(q) + |\hat{c}_s(q) - c_s^*(q)| + |\hat{c}_l(q) - c_l^*(q)| \leq |\hat{c}_s(q) - c_s^*(q)| + |\hat{c}_l(q) - c_l^*(q)|.$$

591 And similarly if  $c_s^*(q) - c_l^*(q) \leq 0$ , we know that  $c_l^*(q) - c_s^*(q) \leq |\hat{c}_s(q) - c_s^*(q)| + |\hat{c}_l(q) - c_l^*(q)|$ .  
 592 Overall, we have

$$\begin{aligned} \mathbb{E}[\text{cost}(\hat{\mathcal{L}}, \hat{\pi}) - \text{cost}(\hat{\mathcal{L}}, \pi^*)] &\leq \mathbb{E} \left[ \sum_{q \in \mathcal{Q}} P(q) |\hat{c}_s(q) - c_s^*(q)| + |\hat{c}_l(q) - c_l^*(q)| \right] \\ &\stackrel{(i)}{\leq} \mathbb{E} \left[ \sqrt{\sum_{q \in \mathcal{Q}} P(q) (\hat{c}_s(q) - c_s^*(q))^2} + \sqrt{\sum_{q \in \mathcal{Q}} P(q) (\hat{c}_l(q) - c_l^*(q))^2} \right] \\ &\stackrel{(ii)}{\leq} \sqrt{\mathbb{E} \left[ \sum_{q \in \mathcal{Q}} P(q) (\hat{c}_s(q) - c_s^*(q))^2 \right]} + \sqrt{\mathbb{E} \left[ \sum_{q \in \mathcal{Q}} P(q) (\hat{c}_l(q) - c_l^*(q))^2 \right]} \\ &\stackrel{(iii)}{\leq} C(B_2 - B_1) \sqrt{\frac{|\mathcal{Q}| \log(N)}{N}}. \end{aligned}$$

593 Here (i) is due to Cauchy-Schwarz, and (ii) is from Jensen's inequality, and (iii) is the standard rate  
 594 of the least squared estimator (Rigollet and Hütter, 2015).

595 For the second difference, we have

$$\begin{aligned} \text{cost}(\hat{\mathcal{L}}, \pi^*) - \text{cost}(\mathcal{L}^*, \pi^*) &= \sum_{q \in \mathcal{Q}} P(q) \left( \mathbb{1}(q \notin \hat{\mathcal{L}}) - \mathbb{1}(q \notin \mathcal{L}^*) \right) \min(c_s^*(q), c_l^*(q)) \\ &= \sum_{q \in \mathcal{Q}} P(q) \left( \mathbb{1}(q \in \mathcal{L}^*) - \mathbb{1}(q \in \hat{\mathcal{L}}) \right) \min(c_s^*(q), c_l^*(q)). \end{aligned}$$

596 Note that for any  $q \in \mathcal{L}^*$ , we know that

$$\begin{aligned} &\hat{P}(q) \left( \min(\hat{c}_s(q), \hat{c}_l(q)) - (B_2 - B_1) \sqrt{\frac{\log(8|\mathcal{Q}|/\delta)}{2 \sum_{n=1}^N \mathbb{1}(q_n = q)}} \right) \\ &\geq \max \left( P(q) - \sqrt{\frac{2 \log(8/\delta)}{N}}, 0 \right) \cdot \left( \min(c_s^*(q), c_l^*(q)) - 2(B_2 - B_1) \sqrt{\frac{\log(8|\mathcal{Q}|/\delta)}{2 \sum_{n=1}^N \mathbb{1}(q_n = q)}} \right) \\ &\geq P(q) \min(c_s^*(q), c_l^*(q)) - C(B_2 - B_1) \cdot \sqrt{\frac{\log(8|\mathcal{Q}|/\delta)}{2 \sum_{n=1}^N \mathbb{1}(q_n = q)}} \\ &\geq P(q) \min(c_s^*(q), c_l^*(q)) - C(B_2 - B_1) \cdot \sqrt{\frac{B_2 |\mathcal{Q}| \log(8|\mathcal{Q}|/\delta)}{B_1 N}}. \end{aligned}$$

597 The last inequality uses event  $E_3$  and Lemma 1. And similarly, for any  $q \notin \mathcal{L}^*$ , we know that

$$\begin{aligned} \hat{P}(q) \left( \min(\hat{c}_s(q), \hat{c}_l(q)) - (B_2 - B_1) \sqrt{\frac{\log(8|\mathcal{Q}|/\delta)}{2 \sum_{n=1}^N \mathbb{1}(q_n = q)}} \right) &\leq \left( P(q) + \sqrt{\frac{2 \log(8/\delta)}{N}} \right) \min(c_s^*(q), c_l^*(q)) \\ &\leq P(q) \min(c_s^*(q), c_l^*(q)) + B_2 \sqrt{\frac{2 \log(8/\delta)}{N}}. \end{aligned}$$

598 Now consider any  $q \in \mathcal{L}_t$  but  $q \notin \mathcal{L}^*$ , and any other  $q' \in \mathcal{L}^*$  but  $q' \notin \mathcal{L}_t$ . We have

$$\begin{aligned} &P(q') \min(c_s^*(q'), c_l^*(q')) - P(q) \min(c_s^*(q), c_l^*(q)) \\ &\leq \hat{P}(q') \left( \min(\hat{c}_s(q'), \hat{c}_l(q')) - (B_2 - B_1) \sqrt{\frac{\log(8|\mathcal{Q}|/\delta)}{2 \sum_{n=1}^N \mathbb{1}(q_n = q')}} \right) \\ &\quad - \hat{P}(q) \left( \min(\hat{c}_s(q), \hat{c}_l(q)) - (B_2 - B_1) \sqrt{\frac{\log(8|\mathcal{Q}|/\delta)}{2 \sum_{n=1}^N \mathbb{1}(q_n = q)}} \right) + C(B_2 - B_1) \cdot \sqrt{\frac{B_2 |\mathcal{Q}| \log(8|\mathcal{Q}|/\delta)}{B_1 N}} \\ &\leq C(B_2 - B_1) \cdot \sqrt{\frac{B_2 |\mathcal{Q}| \log(8|\mathcal{Q}|/\delta)}{B_1 N}}. \end{aligned}$$

Here the last inequality uses the fact that  $q$  is inside  $\mathcal{L}_t$  and thus the difference between the first two terms are upper bounded by 0. Finally, we know that conditioned on  $E_1 \cap E_2 \cap E_3 \cap E_4$ , we have

$$\text{cost}(\hat{\mathcal{L}}, \pi^*) - \text{cost}(\mathcal{L}^*, \pi^*) \leq CL(B_2 - B_1) \cdot \sqrt{\frac{B_2|\mathcal{Q}|\log(8|\mathcal{Q}|/\delta)}{B_1N}}.$$

Overall, we know that

$$\mathbb{E}[\text{cost}(\hat{\mathcal{L}}, \hat{\pi}) - \text{cost}(\hat{\mathcal{L}}, \pi^*)] \leq B_2\delta + CL(B_2 - B_1) \cdot \sqrt{\frac{B_2|\mathcal{Q}|\log(8|\mathcal{Q}|/\delta)}{B_1N}}.$$

Taking  $\delta = 1/N$  finishes the proof.  $\square$

## H Proof of Theorem 4

*Proof.* Let  $g_k(q)$  be the length of the interval between the  $k$ -th and  $(k+1)$ -th arrival of query  $q$  in the sequence of received queries (we set  $g_k(q) = 0$  if  $k$  exceeds the total number of times  $q$  is queried.). Define the following four events:

$$\begin{aligned} E_{1,t} &= \left\{ \forall q \in \mathcal{Q}, |\hat{P}_{t-1}(q) - P(q)| \leq \min \left( 1, \sqrt{\frac{2\log(8T/\delta)}{t-1}} \right) \right\}, \\ E_{2,t} &= \left\{ \forall q \in \mathcal{Q}, \hat{c}_{l,t-1}(q) \in \left[ c_l^*(q) - 2(B_2 - B_1) \min \left( 1, \sqrt{\frac{\log(8T|\mathcal{Q}|/\delta)}{2\sum_{i=1}^{t-1} \mathbb{1}(s_i = 0, q_i = q)}} \right), c_l^*(q) \right] \right\}, \\ E_{3,t} &= \left\{ \forall q \in \mathcal{Q}, \hat{c}_{s,t-1}(q) \in \left[ c_s^*(q) - 2(B_2 - B_1) \min \left( 1, \sqrt{\frac{\log(8T|\mathcal{Q}|/\delta)}{2\sum_{i=1}^{t-1} \mathbb{1}(s_i = 1, q_i = q)}} \right), c_s^*(q) \right] \right\}, \\ E_4 &= \left\{ \forall q \in \mathcal{L}^*, k \leq T, g_k(q) \leq \frac{B_2|\mathcal{Q}|\log(4TL/\delta)}{B_1} \right\}. \end{aligned}$$

From the same analysis as Lemma 3, we know that the four events hold simultaneously with probability at least  $1 - \delta$ .

Let  $E^t = \bigcap_{s=1}^t E_{1,s} \cap E_{2,s} \cap E_{3,s}$ . The regret can be decomposed as follows.

$$\begin{aligned} & \text{Regret}(T) \\ &= \sum_{t=1}^T \mathbb{E}[\text{cost}(q_t, \mathcal{L}_t, \pi_t) - \text{cost}(q_t, \mathcal{L}^*, \pi^*)] \\ &\leq \sum_{t=1}^T \mathbb{E}[\text{cost}(q_t, \mathcal{L}_t, \pi_t) - \text{cost}(q_t, \mathcal{L}^*, \pi^*) \mathbb{1}(E^t)] + \mathbb{E}[\text{cost}(q_t, \mathcal{L}_t, \pi_t) - \text{cost}(q_t, \mathcal{L}^*, \pi^*) \mathbb{1}(\bar{E}^t)] \\ &\leq \sum_{t=1}^T \mathbb{E}[\text{cost}(q_t, \mathcal{L}_t, \pi_t) - \text{cost}(q_t, \mathcal{L}^*, \pi^*) \mathbb{1}(E^t)] + \delta T B_2 \\ &= \sum_{t=1}^T \mathbb{E}[(\text{cost}(q_t, \mathcal{L}_t, \pi_t) - \text{cost}(q_t, \mathcal{L}_t, \pi^*) + \text{cost}(q_t, \mathcal{L}_t, \pi^*) - \text{cost}(q_t, \mathcal{L}^*, \pi^*)) \mathbb{1}(E^t)] + \delta T B_2. \end{aligned}$$

The first difference can be further written as

$$\begin{aligned} & \mathbb{E}[\text{cost}(q_t, \mathcal{L}_t, \pi_t) - \text{cost}(q_t, \mathcal{L}_t, \pi^*) \mid E^t] \\ &= \mathbb{E}[\mathbb{1}(q_t \notin \mathcal{L}_t)(c_s^*(q_t)\pi_t(q_t) + c_l^*(q_t)(1 - \pi_t(q_t)) - c_s^*(q_t)\pi^*(q_t) - c_l^*(q_t)(1 - \pi^*(q_t))) \mid E^t] \\ &= \mathbb{E}[\mathbb{1}(q_t \notin \mathcal{L}_t)(c_s^*(q_t)\pi_t(q_t) + c_l^*(q_t)(1 - \pi_t(q_t)) - \min(c_s^*(q_t), c_l^*(q_t))) \mid E^t] \\ &\leq \mathbb{E}[c_s^*(q_t)\pi_t(q_t) + c_l^*(q_t)(1 - \pi_t(q_t)) - \min(c_s^*(q_t), c_l^*(q_t)) \mid E^t] \\ &= \mathbb{E}[c_s^*(q_t)\mathbb{1}(\hat{c}_{s,t}(q_t) \leq \hat{c}_{l,t}(q_t)) + c_l^*(q_t)\mathbb{1}(\hat{c}_{s,t}(q_t) > \hat{c}_{l,t}(q_t)) - \min(c_s^*(q_t), c_l^*(q_t)) \mid E^t]. \end{aligned}$$

611 Note that if  $\hat{c}_{s,t}(q_t) - \hat{c}_{l,t}(q_t)$  has the same sign as  $c_s^*(q_t) - c_l^*(q_t)$ , the difference  $c_s^*(q_t) \mathbb{1}(\hat{c}_{s,t}(q_t) \leq$   
612  $\hat{c}_{l,t}(q_t)) + c_l^*(q_t) \mathbb{1}(\hat{c}_{s,t}(q_t) > \hat{c}_{l,t}(q_t)) - \min(c_s^*(q_t), c_l^*(q_t))$  becomes 0. Otherwise, if  $c_s^*(q_t) -$   
613  $c_l^*(q_t) > 0$  and  $\hat{c}_{s,t}(q_t) - \hat{c}_{l,t}(q_t) \leq 0$ , we know that  $s_t = 1$  and

$$\begin{aligned} c_s^*(q) - c_l^*(q) &\leq \hat{c}_{s,t}(q) - \hat{c}_{l,t}(q) + 2(B_2 - B_1) \min \left( 1, \sqrt{\frac{\log(8T|\mathcal{Q}|/\delta)}{2 \sum_{i=1}^{t-1} \mathbb{1}(s_i = 1, q_i = q)}} \right) \\ &\leq 2(B_2 - B_1) \min \left( 1, \sqrt{\frac{\log(8T|\mathcal{Q}|/\delta)}{2 \sum_{i=1}^{t-1} \mathbb{1}(s_i = 1, q_i = q)}} \right). \end{aligned}$$

614 And similarly if  $c_s^*(q) - c_l^*(q) \leq 0$  and  $\hat{c}_{s,t}(q_t) - \hat{c}_{l,t}(q_t) > 0$ , we know that  $s_t = 0$  and  $c_l^*(q) -$   
615  $c_s^*(q) \leq 2(B_2 - B_1) \min \left( 1, \sqrt{\frac{\log(8T|\mathcal{Q}|/\delta)}{2 \sum_{i=1}^{t-1} \mathbb{1}(s_i = 0, q_i = q)}} \right)$ . Overall, we have

$$\begin{aligned} &\sum_{t=1}^T \mathbb{E}[(\text{cost}(q_t, \mathcal{L}_t, \pi_t) - \text{cost}(q_t, \mathcal{L}_t, \pi^*))] \\ &\leq 2(B_2 - B_1) \sum_{t=1}^T \sum_{q \in \mathcal{Q}} \mathbb{E} \left[ \mathbb{1}(s_t = 1, q_t = q) \min \left( 1, \sqrt{\frac{\log(8T|\mathcal{Q}|/\delta)}{2 \sum_{i=1}^{t-1} \mathbb{1}(s_i = 1, q_i = q)}} \right) \right. \\ &\quad \left. + \mathbb{1}(s_t = 0, q_t = q) \min \left( 1, \sqrt{\frac{\log(8T|\mathcal{Q}|/\delta)}{2 \sum_{i=1}^{t-1} \mathbb{1}(s_i = 0, q_i = q)}} \right) \right] \\ &\leq 2(B_2 - B_1) \sqrt{|\mathcal{Q}|T \log(8|\mathcal{Q}|T/\delta)}. \end{aligned}$$

616 Here the last inequality uses the fact that for each  $q \in \mathcal{Q}$ , the summation over time step is upper  
617 bounded by  $2 \sum_{i=1}^{T(q)} \sqrt{\log(8T|\mathcal{Q}|/\delta)/2i} \leq 2\sqrt{\log(8T|\mathcal{Q}|/\delta)T(q)}$ , where  $T(q)$  is the number of  
618 steps of receiving query  $q$  in total  $T$  steps. Optimizing over  $T(q)$  gives the final bound.

619 For the second difference, we have

$$\begin{aligned} \mathbb{E}[\text{cost}(\mathcal{L}_t, \pi^*) - \text{cost}(\mathcal{L}^*, \pi^*) \mid E^t] &= \mathbb{E} \left[ \sum_{q \in \mathcal{Q}} P(q) (\mathbb{1}(q \notin \mathcal{L}_t) - \mathbb{1}(q \notin \mathcal{L}^*)) \min(c_s^*(q), c_l^*(q)) \mid E^t \right] \\ &= \mathbb{E} \left[ \sum_{q \in \mathcal{Q}} P(q) (\mathbb{1}(q \in \mathcal{L}^*) - \mathbb{1}(q \in \mathcal{L}_t)) \min(c_s^*(q), c_l^*(q)) \mid E^t \right]. \end{aligned}$$

620 Note that for any  $q \in \mathcal{L}^*$ , we know that

$$\begin{aligned} &\hat{P}_t(q) \min(\hat{c}_{s,t}(q), \hat{c}_{l,t}(q)) \\ &\geq \max \left( P(q) - \sqrt{\frac{2 \log(8/\delta)}{t}}, 0 \right) \cdot \mathbb{1}(\pi_t(q) = 1) \left( c_s^*(q) - 2(B_2 - B_1) \min \left( 1, \sqrt{\frac{\log(8|\mathcal{Q}|/\delta)}{2 \sum_{i=1}^{t-1} \mathbb{1}(s_i = 1, q_i = q)}} \right) \right) \\ &\quad + \mathbb{1}(\pi_t(q) = 0) \left( c_l^*(q) - 2(B_2 - B_1) \min \left( 1, \sqrt{\frac{\log(8|\mathcal{Q}|/\delta)}{2 \sum_{i=1}^{t-1} \mathbb{1}(s_i = 0, q_i = q)}} \right) \right) \\ &\geq P(q) \min(c_s^*(q), c_l^*(q)) - (B_2 - B_1) \sqrt{\frac{2 \log(8/\delta)}{t}} + P(q) \cdot \left( \mathbb{1}(\pi_t(q) = 1) \right. \\ &\quad \cdot \left( c_s^*(q) - 2(B_2 - B_1) \min \left( 1, \sqrt{\frac{\log(8|\mathcal{Q}|/\delta)}{2 \sum_{i=1}^{t-1} \mathbb{1}(s_i = 1, q_i = q)}} \right) \right) \\ &\quad \left. + \mathbb{1}(\pi_t(q) = 0) \left( c_l^*(q) - 2(B_2 - B_1) \min \left( 1, \sqrt{\frac{\log(8|\mathcal{Q}|/\delta)}{2 \sum_{i=1}^{t-1} \mathbb{1}(s_i = 0, q_i = q)}} \right) \right) - \min(c_s^*(q), c_l^*(q)) \right) \\ &\geq P(q) \min(c_s^*(q), c_l^*(q)) - C(B_2 - B_1) \cdot \min \left( 1, \sqrt{\frac{\log(8|\mathcal{Q}|/\delta)}{2 \sum_{i=1}^{t-1} \mathbb{1}(s_i = \pi_t(q), q_i = q)}} \right). \end{aligned}$$

Below we justify the last inequality. First, note that  $\pi_t(q) = 1$  is equivalent to that  $\hat{c}_{s,t}(q) \leq \hat{c}_{l,t}(q)$ . Thus if  $\hat{c}_{s,t}(q_t) - \hat{c}_{l,t}(q_t)$  has the same sign as  $c_s^*(q_t) - c_l^*(q_t)$ , the above inequality holds. Now consider the case when  $\hat{c}_{s,t}(q_t) - \hat{c}_{l,t}(q_t)$  has a different sign as  $c_s^*(q_t) - c_l^*(q_t)$ . Assume that  $\hat{c}_{s,t}(q_t) > \hat{c}_{l,t}(q_t)$  and  $c_s^*(q_t) < c_l^*(q_t)$ . We know that  $\pi_t(q) = 0$ , and

$$\begin{aligned} & c_l^*(q) - 2(B_2 - B_1) \min \left( 1, \sqrt{\frac{\log(8|\mathcal{Q}|/\delta)}{2 \sum_{i=1}^{t-1} \mathbb{1}(s_i = 0, q_i = q)}} \right) - c_s^*(q) \\ & > -2(B_2 - B_1) \min \left( 1, \sqrt{\frac{\log(8|\mathcal{Q}|/\delta)}{2 \sum_{i=1}^{t-1} \mathbb{1}(s_i = 0, q_i = q)}} \right). \end{aligned}$$

Similarly we can prove that for the reversed case. Now for any  $q \notin \mathcal{L}^*$ , we know that

$$\begin{aligned} \hat{P}_t(q) \min(\hat{c}_{s,t}(q), \hat{c}_{l,t}(q)) & \leq \left( P(q) + \sqrt{\frac{2 \log(8/\delta)}{t}} \right) \min(c_s^*(q), c_l^*(q)) \\ & \leq P(q) \min(c_s^*(q), c_l^*(q)) + B_2 \sqrt{\frac{2 \log(8/\delta)}{t}}. \end{aligned}$$

Now consider any  $q \in \mathcal{L}_t$  but  $q \notin \mathcal{L}^*$ , and any other  $q' \in \mathcal{L}^*$  but  $q' \notin \mathcal{L}_t$ . We have

$$\begin{aligned} & P(q') \min(c_s^*(q'), c_l^*(q')) - P(q) \min(c_s^*(q), c_l^*(q)) \\ & \leq \hat{P}_t(q') \min(\hat{c}_{s,t}(q'), \hat{c}_{l,t}(q')) - \hat{P}_t(q) \min(\hat{c}_{s,t}(q), \hat{c}_{l,t}(q)) \\ & \quad + C(B_2 - B_1) \cdot \min \left( 1, \sqrt{\frac{\log(8|\mathcal{Q}|/\delta)}{2 \sum_{i=1}^{t-1} \mathbb{1}(s_i = \pi_t(q), q_i = q)}} \right) + B_2 \sqrt{\frac{2 \log(8/\delta)}{t}} \\ & \leq C(B_2 - B_1) \cdot \min \left( 1, \sqrt{\frac{\log(8|\mathcal{Q}|/\delta)}{2 \sum_{i=1}^{t-1} \mathbb{1}(s_i = \pi_t(q), q_i = q)}} \right) + B_2 \sqrt{\frac{2 \log(8/\delta)}{t}}. \end{aligned}$$

Here the last inequality uses the fact that  $q$  is inside  $\mathcal{L}_t$ . Thus we have

$$\begin{aligned} & \sum_{t=1}^T \mathbb{E}[\text{cost}(\mathcal{L}_t, \pi^*) - \text{cost}(\mathcal{L}^*, \pi^*) \mathbb{1}(E^t)] \\ & \leq \sum_{t=1}^T \mathbb{E}[\text{cost}(\mathcal{L}_t, \pi^*) - \text{cost}(\mathcal{L}^*, \pi^*) \mathbb{1}(E^t \cap E_4)] + B_2 T \delta \\ & \leq B_2 T \delta + C \sum_{t=1}^T \mathbb{E} \left[ \sum_{q \in \mathcal{L}^*} \mathbb{1}(q \notin \mathcal{L}_t) (B_2 - B_1) \cdot \min \left( 1, \sqrt{\frac{\log(8|\mathcal{Q}|/\delta)}{2 \sum_{i=1}^{t-1} \mathbb{1}(s_i = \pi_t(q), q_i = q)}} \right) \right. \\ & \quad \left. + B_2 \sqrt{\frac{2 \log(8/\delta)}{t}} \mid E^t \cap E_4 \right] \\ & \leq C \cdot \left( B_2 T \delta + L B_2 \sqrt{2T \log(8/\delta)} + (B_2 - B_1) \log(8T|\mathcal{Q}|/\delta) \right. \\ & \quad \left. \cdot \sum_{q \in \mathcal{L}^*} \sum_{t=1}^T \mathbb{E} \left[ \mathbb{1}(q \notin \mathcal{L}_t) \cdot \sqrt{\frac{1}{\sum_{i=1}^{t-1} \mathbb{1}(s_i = \pi_t(q), q_i = q)}} \mid E^t \cap E_4 \right] \right) \\ & = C \cdot \left( B_2 T \delta + L B_2 \sqrt{2T \log(8/\delta)} + (B_2 - B_1) \log(8T|\mathcal{Q}|/\delta) \right. \\ & \quad \left. \cdot \sum_{q \in \mathcal{L}^*} \sum_{\pi \in \{1,2\}} \sum_{t=1}^T \mathbb{E} \left[ \mathbb{1}(q \notin \mathcal{L}_t, \pi_t(q) = \pi) \cdot \sqrt{\frac{1}{\sum_{i=1}^{t-1} \mathbb{1}(s_i = \pi, q_i = q)}} \mid E^t \cap E_4 \right] \right). \end{aligned}$$

Let  $T_t(q, \pi) = \sum_{i=1}^{t-1} \mathbb{1}(s_i = \pi, q_i = q)$ . Now for each  $q \in \mathcal{L}^*$  and  $\pi \in \{1, 2\}$ , we look at the term  $\sum_{t=1}^T \mathbb{E} \left[ \mathbb{1}(q \notin \mathcal{L}_t, \pi_t = \pi) \cdot \min \left( 1, \sqrt{\frac{1}{T_t(q, \pi)}} \right) \mid E^t \cap E_4 \right]$ . We prove the following lemma:



630 **Lemma 5.** *We have*

$$\sum_{t=1}^T \mathbb{E} \left[ \mathbb{1}(q \notin \mathcal{L}_t, \pi_t(q) = \pi) \cdot \min \left( 1, \sqrt{\frac{1}{T_t(q, \pi)}} \mid E^t \cap E_4 \right) \right] \leq \frac{CB_2|\mathcal{Q}|\log(3TL/\delta)\sqrt{T}}{B_1} + \delta.$$

631 *Proof.* Let  $t_k(q) = \sum_{l=1}^{k-1} g_l(q)$  be the step that the  $k$ -th query of  $q$  arrives. And let  $E = (\bigcap_{t=1}^T E_t) \cap$   
 632  $E_4$ . The summation can be written as

$$\begin{aligned} & \sum_{t=1}^T \mathbb{E} \left[ \mathbb{1}(q \notin \mathcal{L}_t, \pi_t(q) = \pi) \cdot \sqrt{\frac{1}{T_t(q, \pi)}} \mid E^t \cap E_3 \right] \\ & \leq \sum_{t=1}^T \mathbb{E} \left[ \mathbb{1}(q \notin \mathcal{L}_t, \pi_t(q) = \pi) \cdot \sqrt{\frac{1}{T_t(q, \pi)}} \mid E \right] + \delta \\ & = \sum_{k=0}^T \mathbb{E} \left[ \sum_{t=t_k(q)+1}^{t_{k+1}(q)} \mathbb{1}(q \notin \mathcal{L}_t, \pi_t(q) = \pi) \cdot \sqrt{\frac{1}{T_t(q, \pi)}} \mid E \right] \\ & \leq \sum_{k=0}^T \mathbb{E} \left[ \sum_{t=t_k(q)+1}^{t_{k+1}(q)} \mathbb{1}(q \notin \mathcal{L}_{t_{k+1}(q)}, \pi_{t_{k+1}}(q) = \pi) \cdot \sqrt{\frac{1}{T_{t_k(q)+1}(q, \pi)}} \mid E \right]. \end{aligned}$$

633 The last inequality is due to (a).  $T_t(q, \pi)$  does not change if at round  $t$  the query is not  $q$ ; (b). if  
 634  $q \in \mathcal{L}_{t_{k+1}(q)}$ , we will have  $q \in \mathcal{L}_t$  for any  $t \in [t_k(q) + 1, t_{k+1}(q)]$  since  $q$  never arrives in the middle  
 635 and must remain in the cache set until  $t_{k+1}(q)$ ; (c) For  $t \in [t_k(q) + 1, t_{k+1}(q)]$ ,  $\pi_t$  does not change  
 636 since both the frequency and cost estimator does not change for  $q$ . Now from event  $E_4$ , we know that

$$\begin{aligned} & \sum_{k=0}^T \mathbb{E} \left[ \sum_{t=t_k(q)+1}^{t_{k+1}(q)} \mathbb{1}(q \notin \mathcal{L}_{t_{k+1}(q)}, \pi_{t_{k+1}}(q) = \pi) \cdot \sqrt{\frac{1}{T_{t_k(q)+1}(q, \pi)}} \mid E \right] \\ & \leq \sum_{k=0}^T \mathbb{E} \left[ g_k(q) \cdot \mathbb{1}(q \notin \mathcal{L}_{t_{k+1}(q)}, \pi_{t_{k+1}}(q) = \pi) \cdot \sqrt{\frac{1}{T_{t_k(q)+1}(q, \pi)}} \mid E \right] \\ & \leq \frac{B_2|\mathcal{Q}|\log(4TL/\delta)}{B_1} \cdot \sum_{k=0}^T \mathbb{E} \left[ \mathbb{1}(q \notin \mathcal{L}_{t_{k+1}(q)}, \pi_{t_{k+1}}(q) = \pi) \cdot \sqrt{\frac{1}{T_{t_k(q)+1}(q, \pi)}} \mid E \right] \end{aligned}$$

637 We know that  $T_{t_{k+1}(q)+1}(q, \pi) = T_{t_{k+1}(q)}(q, \pi) + 1 = T_{t_k(q)+1}(q, \pi) + 1$  if  $q \notin \mathcal{L}_{t_{k+1}(q)}$  and  
 638  $\pi_{t_{k+1}}(q) = \pi$  since the query  $q$  missing the cache will be sent to one of the models, and only the  
 639 one selected will observe the cost. Thus overall, we know that we have either  $T_{t_{k+1}(q)+1}(q, \pi) =$   
 640  $T_{t_k(q)+1}(q, \pi) + 1$ , or  $\mathbb{1}(q \notin \mathcal{L}_{t_{k+1}(q)}, \pi_{t_{k+1}}(q) = \pi) \cdot \sqrt{\frac{1}{T_{t_k(q)+1}(q, \pi)}} = 0$  and  $T_{t_{k+1}(q)+1}(q, \pi) =$   
 641  $T_{t_k(q)+1}(q, \pi)$ . Thus overall, we have

$$\sum_{k=0}^T \mathbb{E} \left[ \mathbb{1}(q \notin \mathcal{L}_{t_{k+1}(q)}, \pi_{t_{k+1}}(q) = \pi) \cdot \sqrt{\frac{1}{T_{t_k(q)+1}(q, \pi)}} \mid E \right] \leq \sum_{k=1}^T \frac{1}{\sqrt{k}} \leq C\sqrt{T}.$$

642 □

643 Thus we know that the second difference satisfies

$$\begin{aligned} \sum_{t=1}^T \mathbb{E}[\text{cost}(\mathcal{L}_t, \pi^*) - \text{cost}(\mathcal{L}^*, \pi^*) \mathbb{1}(E^t)] & \leq C \cdot \left( B_2T\delta + LB_2\sqrt{2T\log(8/\delta)} \right. \\ & \quad \left. + \frac{L(B_2 - B_1)B_2|\mathcal{Q}|L\log^2(T|\mathcal{Q}|/\delta)}{B_1} \cdot \sqrt{T} \right). \end{aligned}$$

644 Overall by taking  $\delta = 1/T$ , we know that

$$\text{Regret}(T) \leq \frac{CL(B_2 - B_1)B_2|\mathcal{Q}|L\log^2(T|\mathcal{Q}|)}{B_1} \cdot \sqrt{T}.$$

645 □

## I Additional Experiments on Synthetic Datasets

We conduct synthetic online and offline experiments for joint optimization of caching and model selection. We use i.i.d. Bernoulli distributions for two models because we want to mimic the model ensemble use case and give a large penalty to the wrong output. In Figure 2, we plot the cumulative cost and regret in online learning for LFU and LEC caching algorithms. We present more data points in Table 3 and Table 4. Similar to the real dataset setting, we compare all combinations of caching strategy choices and model selector choices. We consider the frequency distribution as power distribution with  $\alpha = 0.5$  and  $0.8$ . The ground truth cost for each query processed by both models is set as a sample from  $r \cdot X + 1$ , where  $r$  is called as cost ratio and  $X$  is a random variable generated from a Bernoulli distribution with the parameter  $0.5$ . We consider the model selector accuracy with  $0.8$  and  $1$ . We repeat the simulation  $100$  times and take the mean. Consistent with Figure 2, our simulation suggests that LEC with a perfect model selector significantly improves the baselines when the cost ratio is large. Simulation  $100$  times cannot remove all randomness so we can observe some fluctuations. Theoretically, the columns of choosing model 1 and the columns of choosing model 2 should behave similarly.

| $\alpha$ | cost ratio | selector accuracy | LFU+ model 1 | LFU+ model 2 | LFU+ selector | LEC+ model 1 | LEC+ model 2 | LEC+ selector |
|----------|------------|-------------------|--------------|--------------|---------------|--------------|--------------|---------------|
| 0.5      | 1.5        | 0.8               | 6.82         | 6.54         | 5.30          | 5.61         | 5.64         | <b>4.55</b>   |
| 0.8      | 1.5        | 0.8               | 8.90         | 9.63         | 6.72          | 7.19         | 8.09         | <b>6.34</b>   |
| 0.5      | 1.5        | 1                 | 6.08         | 6.97         | 4.17          | 6.08         | 5.73         | <b>3.44</b>   |
| 0.8      | 1.5        | 1                 | 9.15         | 8.99         | 5.61          | 7.42         | 7.79         | <b>4.53</b>   |
| 0.5      | 100        | 0.8               | 188.74       | 211.91       | 135.81        | 76.44        | 57.52        | <b>55.85</b>  |
| 0.8      | 100        | 0.8               | 309.82       | 260.22       | 185.83        | 116.49       | 84.90        | <b>75.59</b>  |
| 0.5      | 100        | 1                 | 187.66       | 159.15       | 110.83        | 76.56        | 76.64        | <b>6.22</b>   |
| 0.8      | 100        | 1                 | 302.81       | 252.69       | 145.61        | 61.04        | 137.45       | <b>12.26</b>  |

Table 3: Evaluation of offline algorithms on synthetic datasets.  $\alpha$  is the parameter of the power distribution of the prompts. The table lists cumulative costs ( $10^3$ ) for different algorithms. “model 1” means always choosing model 1, and “model 2” means always choosing model 2.

| $\alpha$ | cost ratio | LFU+ model 1 | LFU+ model 2 | LFU+ selector | LEC+ model 1 | LEC+ model 2 | LEC+ selector |
|----------|------------|--------------|--------------|---------------|--------------|--------------|---------------|
| 0.5      | 1.5        | 6.87         | 6.52         | 5.18          | 6.12         | 6.04         | <b>4.86</b>   |
| 0.8      | 1.5        | 8.82         | 9.52         | 7.44          | 8.07         | 8.28         | <b>6.35</b>   |
| 0.5      | 100        | 206.29       | 207.88       | 87.99         | 58.44        | 73.91        | <b>10.54</b>  |
| 0.8      | 100        | 266.98       | 265.24       | 115.29        | 115.80       | 107.79       | <b>7.19</b>   |

Table 4: Evaluation of online algorithms on synthetic datasets.  $\alpha$  is the parameter of the power distribution of the prompts. The table lists cumulative costs ( $10^3$ ) for different algorithms. “model 1” means always choosing model 1, and “model 2” means always choosing model 2.
